# Supplementary material for: Multiple functional groups in UiO-66 improve chemical warfare agent simulant degradation
Source: Royal Society of Chemistry journal article supplement (doi:10.1039/c9cc02252j), 2019-01-01
Supplement: c9cc02252j1.pdf [file c9cc02252j1.pdf]

# **Multiple Functional Groups in UiO-66**

## **Improve Chemical Warfare Agent**

### **Simulant Degradation**

Mark Kalaj, Joseph M. Palomba, Kyle C. Bentz, and Seth M. Cohen\*

*Department of Chemistry and Biochemistry, University of California, San Diego, La  
Jolla, California 92093, United States*

## **SUPPORTING INFORMATION**

## **Experimental**

### **Materials**

All solvents and starting materials were purchased from chemical suppliers and used without further purification (Sigma Aldrich, Alfa Aesar, EMD, and TCI).

### **Materials Synthesis**

#### **MOF Synthesis:**

##### **One Ligand Synthesis:**

Zirconium(IV) chloride (0.26 mmol) and one of the following: terephthalic acid (0.26 mmol, 0.286 g), 2-aminoterephthalic acid (0.26 mmol, 0.312 g), 2-hydroxyterephthalic acid (0.26 mmol, 0.312 g), 2-nitroterephthalic acid (0.26 mmol, 0.364 g), or 2-bromoterephthalic acid (0.26 mmol, 0.423 g) were dissolved in 15 mL DMF with 0.447 mL glacial acetic acid in a 20-mL vial. The capped vial was placed in an oven and heated to 120 °C for 24 h. After cooling to room temperature, the particles were collected by centrifugation (fixed-angle rotor, 6500 rpm, 15 min), washed with 3×10 mL portions of MeOH, and 1×10 mL hexanes and dried under vacuum at room temperature.

##### **Two Ligand Synthesis:**

Zirconium(IV) chloride (0.26 mmol) and a combination of two of the following: terephthalic acid (0.13 mmol, 0.143 g), 2-aminoterephthalic acid (0.13 mmol, 0.156 g), 2-hydroxyterephthalic acid (0.13 mmol, 0.156 g), 2-nitroterephthalic acid (0.13 mmol, 0.182 g), or 2-bromoterephthalic acid (0.13 mmol, 0.211 g) were dissolved in 15 mL DMF with 0.447 mL glacial acetic acid in a 20 mL vial. The capped vial was placed in an oven and

heated to 120 °C for 24 h. After cooling to room temperature, the particles were collected by centrifugation (fixed-angle rotor, 6500 rpm, 15 min), washed with 3×10 mL portions of MeOH, and 1×10 mL hexanes and dried under vacuum at room temperature.

### **Three Ligand Synthesis:**

Zirconium(IV) chloride (0.26 mmol) and a combination of three of the following: terephthalic acid (0.087 mmol, 0.096 g), 2-aminoterephthalic acid (0.087 mmol, 0.105g), 2-hydroxyterephthalic acid (0.087 mmol, 0.105 g), 2-nitroterephthalic acid (0.087 mmol, 0.121 g), or 2-bromoterephthalic acid (0.087 mmol, 0.141 g) were dissolved in 15 mL DMF with 0.447 mL glacial acetic acid in a 20 mL vial. The capped vial was placed in an oven and heated to 120 °C for 24 h. After cooling to room temperature, the particles were collected by centrifugation (fixed-angle rotor, 6500 rpm, 15 min), washed with 3×10 mL portions of MeOH, and 1×10 mL hexanes and dried under vacuum at room temperature.

### **Four Ligand Synthesis:**

Zirconium(IV) chloride (0.26 mmol) and a combination of four of the following: terephthalic acid (0.065 mmol, 0.072 g), 2-aminoterephthalic acid (0.065 mmol, 0.078 g), 2-hydroxyterephthalic acid (0.065 mmol, 0.078 g), 2-nitroterephthalic acid (0.065 mmol, 0.091 g), or 2-bromoterephthalic acid (0.065 mmol, 0.106 g) were dissolved in 15 mL DMF with 0.447 mL glacial acetic acid in a 20 mL vial. The capped vial was placed in an oven and heated to 120 °C for 24 h. After cooling to room temperature, the particles were collected by centrifugation (fixed-angle rotor, 6500 rpm, 15 min), washed with 3×10 mL portions of MeOH, and 1×10 mL hexanes and dried under vacuum at room temperature.

### **Five Ligand Synthesis:**

Zirconium(IV) chloride (0.26 mmol) and terephthalic acid (0.052 mmol, 0.057 g), 2-aminoterephthalic acid (0.052 mmol, 0.062 g), 2-hydroxyterephthalic acid (0.052 mmol, 0.062 g), 2-nitroterephthalic acid (0.052 mmol, 0.073 g), or 2-bromoterephthalic acid (0.052 mmol, 0.085 g) were dissolved in 15 mL DMF with 0.447 mL glacial acetic acid in a 20 mL vial. The capped vial was placed in an oven and heated to 120 °C for 24 h. After cooling to room temperature, the particles were collected by centrifugation (fixed-angle rotor, 6500 rpm, 15 min), washed with 3×10 mL portions of MeOH, and 1×10 mL hexanes and dried under vacuum at room temperature.

### **Characterization Methods**

**Nuclear Magnetic Resonance (NMR).** Proton nuclear magnetic resonance spectra (<sup>1</sup>H NMR) were recorded on a Varian FT-NMR spectrometer (400 MHz). Chemical shifts are quoted in parts per million (ppm) referenced to the appropriate solvent peak or 0 ppm for TMS. MOFs were digested for NMR analysis by immersion of ~8-10 mg MOF in 580 μL DMSO-*d*<sub>6</sub> with 20 μL HF (48% in water). Samples were kept in this acidic solution at room temperature until the MOF was fully dissolved.

**Powder X-ray Diffraction (PXRD).** PXRD data was collected at room temperature on a Bruker D8 Advance diffractometer running at 40 kV, 40 mA for Cu Kα ( $\lambda = 1.5418 \text{ \AA}$ ), with a scan speed of 0.5 sec/step, a step size of 0.01° in 2θ, and a 2θ range of 3-50° at room temperature.

**Scanning Electron Microscopy (SEM).** MOFs were placed on conductive carbon tape on a sample holder and coated using an Ir-sputter coating for 7 sec. A Zeiss Sigma 500 ESEM microscope was used for acquiring images using a 2-3 kV energy source under vacuum at a working distance of 5 mm.

**Thermogravimetric analysis (TGA).** ~10 mg of sample were placed in a 100  $\mu$ L aluminum crucible. Samples were analyzed on a Mettler Toledo Star TGA/DSC using a temperature range of 30-600  $^{\circ}$ C scanning at 5  $^{\circ}$ C/min synthetic air (75  $\text{cm}^3$ /min air flow rate) for sample degradation measurements and a heat-cool-heat procedure at 10  $^{\circ}$ C/min for melting point determination.

**$\text{N}_2$  Gas Sorption Analysis:** Samples for analysis were evacuated in a vacuum oven overnight at room temperature prior to analysis. ~50 mg of sample were then transferred to pre-weighed sample tubes and degassed at 105 $^{\circ}$  C on a Micromeritics ASAP 2020 Adsorption Analyzer for a minimum of 12 h or until the outgas rate was <5 mmHG. After degassing, the sample tubes were re-weighed to obtain a consistent mass for the samples. Sorption data and BET surface area ( $\text{m}^2$ /g) measurements were collected at 77 K with  $\text{N}_2$  on a Micromeritics ASAP 2020 Adsorption Analyzer using volumetric technique.

**Catalysis Experiments.** In this study, DMNP hydrolysis was measured using a modified version of a previously reported procedure (*Chem. Commun.* **2018**, 54, 5768-5771). All catalytic monitoring was carried out using a BioTek Synergy H4 plate reader using single wavelength absorbance mode. 20 and 40 mM of *N*-ethylmorpholine buffer was prepared

from deionized water adjusted to pH = 8.0. A plot of absorbance of *p*-nitrophenol at varying concentrations was measured yielding a calibration curve with a slope of 3.48 Abs/mM (*Chem. Commun.* **2018**, *54*, 5768-5771). MOF samples were prepared by weighing 6 mg of MOF powder and diluting this powder in 10 mL of deionized water. These solutions were rigorously sonicated and vortexed (>3× of each) and diluted in half with 40 mM buffer solution yielding 300 µg/mL MOF in 20 mM buffer solution. Dimethyl *p*-nitrophenylphosphate (DMNP) hydrolysis assays with MOF powders were carried out in Olympus Plastics clear, flat-bottom 96-well plates. Each well was prepared with 100 µL total volume containing: 95 µL MOF suspension in buffer and 5 µL substrate (25 mM DMNP in MeOH; 1.25 mM total concentration; 0.125 µmol). Upon the addition of substrate using a multi-channel pipette, hydrolysis was monitored by the change in absorbance ( $\lambda_{\text{max}} = 407 \text{ nm}$ ) over 15 min at 24 °C with 3 sec shaking of the plate every 10 sec. The absorbance was monitored from the 30 to 360 sec time period, as previously reported (*Chem. Commun.* **2019**, *55*, 3481-3484). Reported activities for MOF samples are an average of seven replicates. Hydrolysis rates were adjusted to account for the increased mass of the various species such that a direct comparison could be made across all materials in this study as previously reported (*Chem. Commun.* **2019**, *55*, 3481-3484).

## Characterization

### Powder X-ray Diffraction (PXRD) and $^1\text{H}$ NMR Digestions

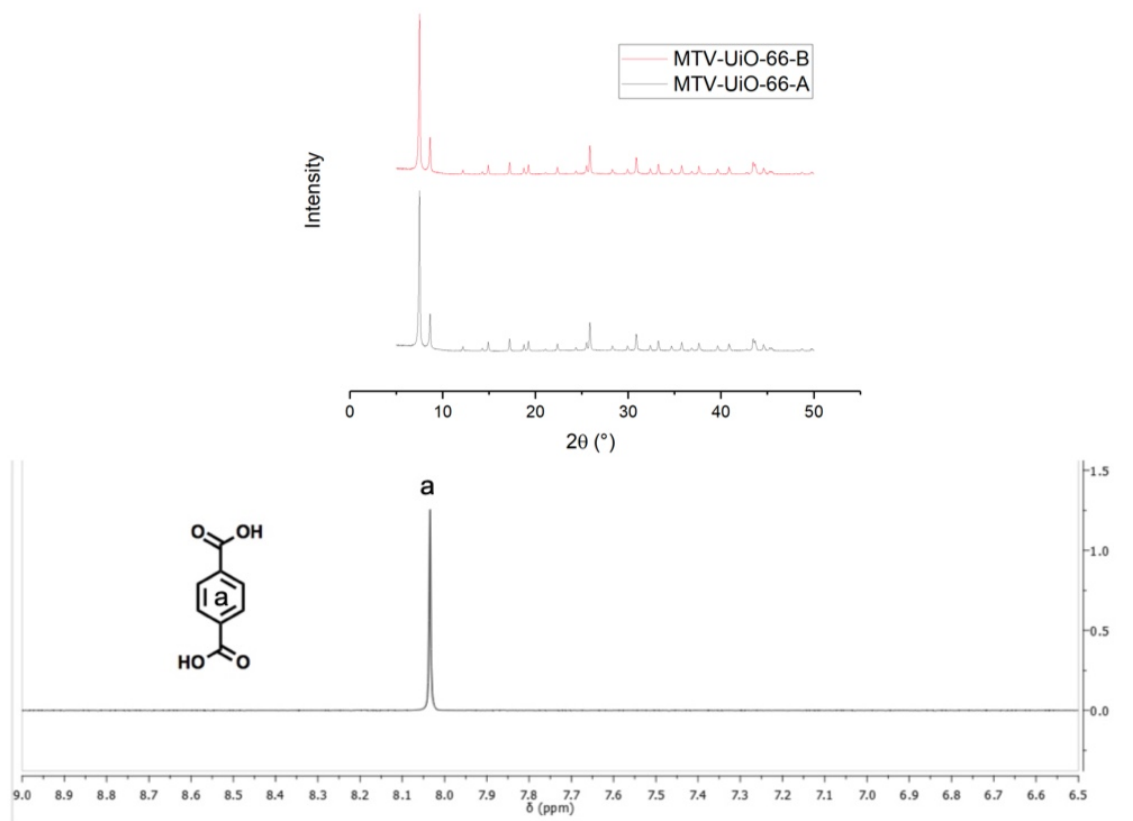

**Figure S1.** *Top:* PXRD of MTV-UiO-66-A. *Bottom:*  $^1\text{H}$  NMR digestion of MTV-UiO-66-A.

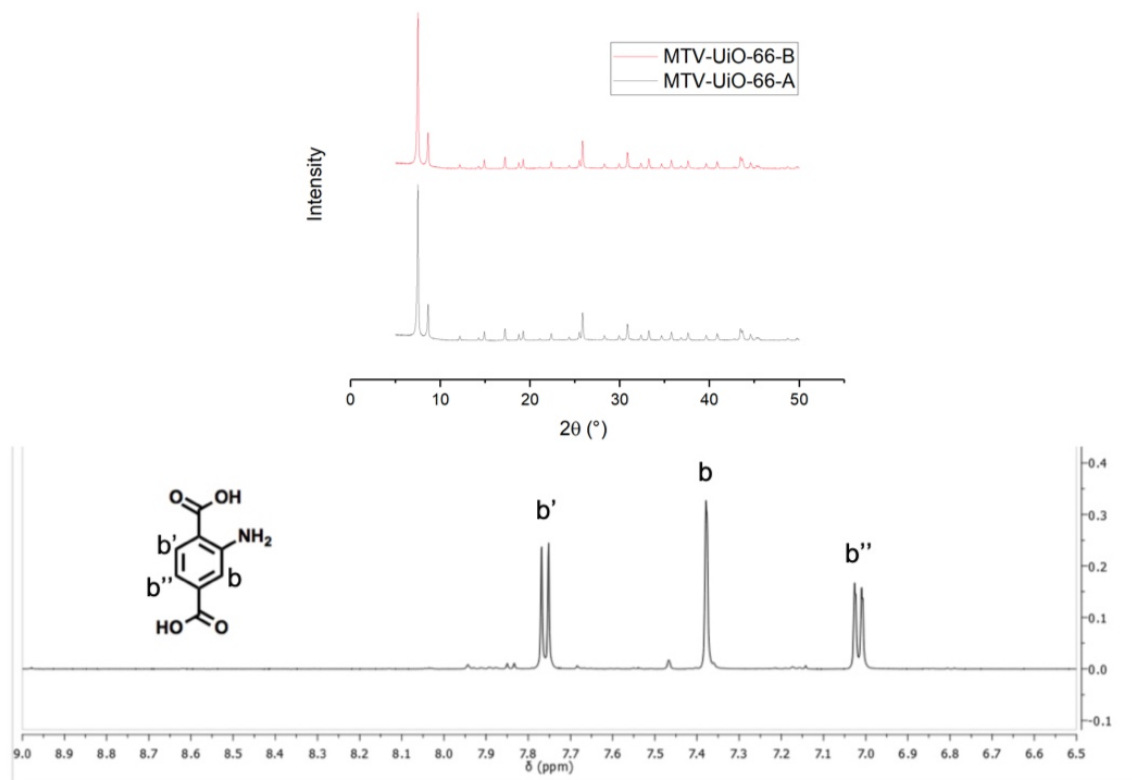

**Figure 2.** *Top:* PXR of MTV-UiO-66-B. *Bottom:*  $^1\text{H}$  NMR digestion of MTV-UiO-66-B.



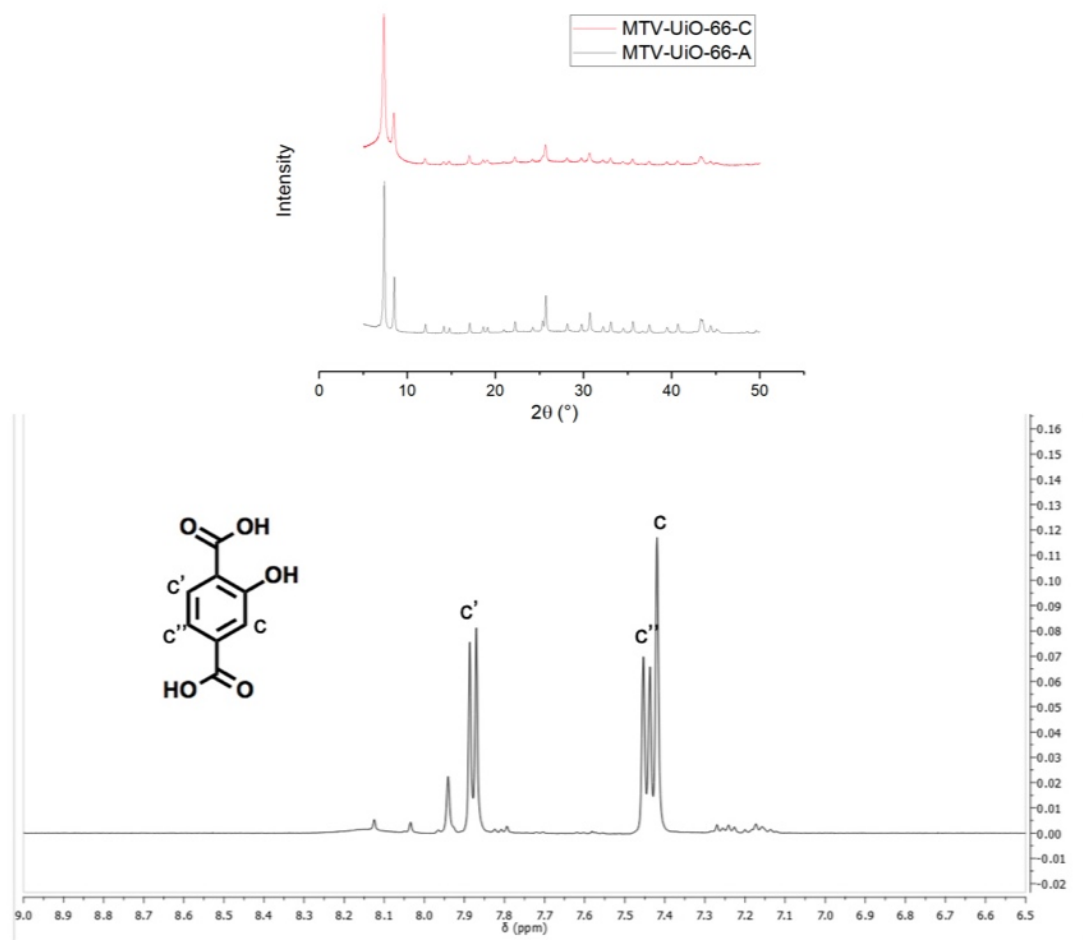

**Figure S3.** *Top:* PXR of MTV-UiO-66-C. *Bottom:*  $^1\text{H}$  NMR digestion of MTV-UiO-66-C.

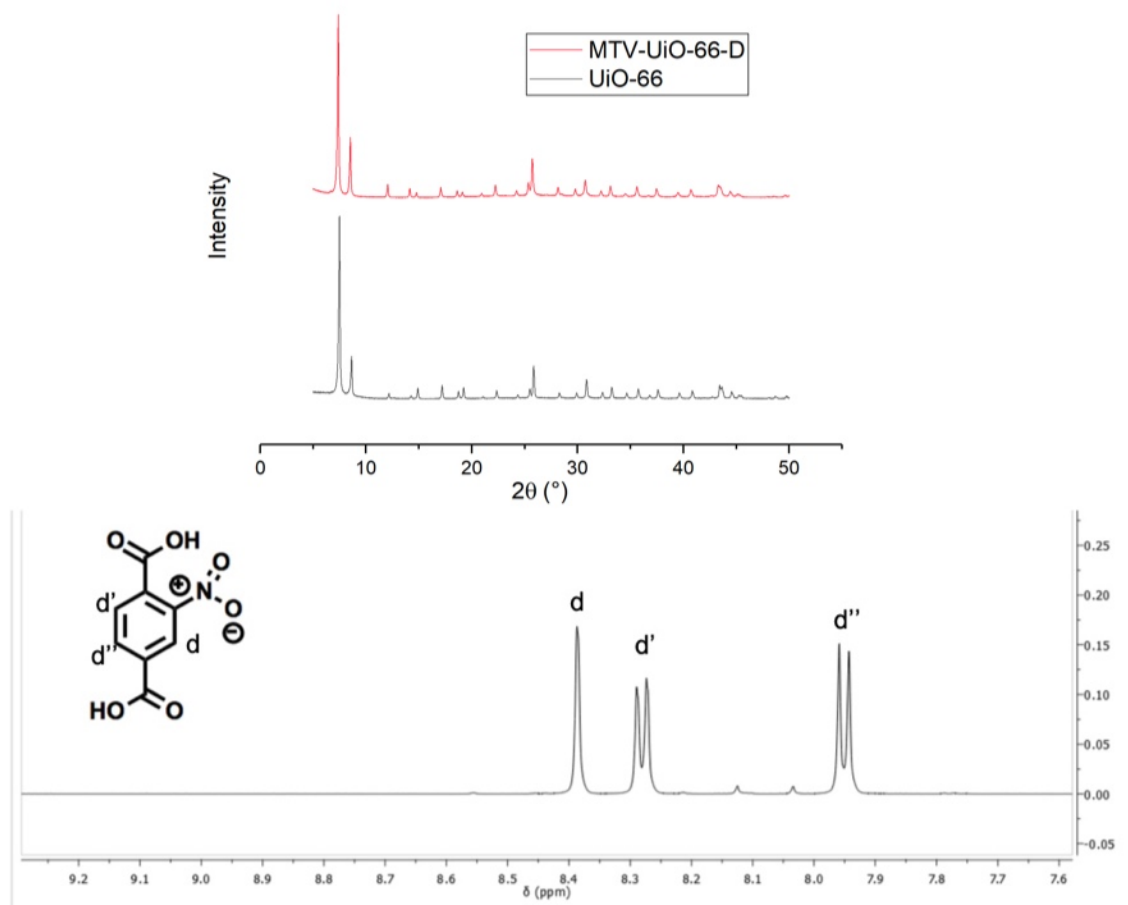

**Figure S4.** *Top:* PXR of MTV-UiO-66-D. *Bottom:*  $^1\text{H}$  NMR digestion of MTV-UiO-66-D.

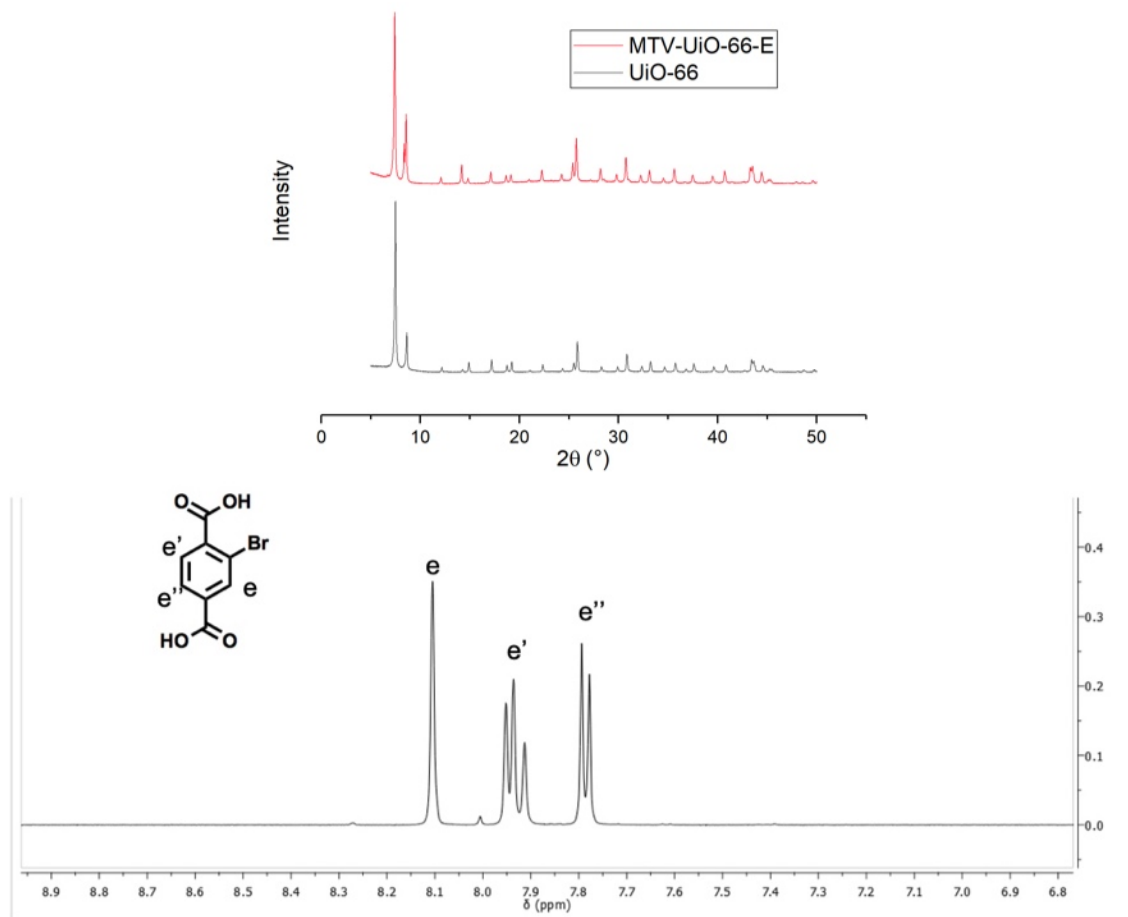

**Figure S5.** *Top:* PXRD of MTV-UiO-66-E. *Bottom:*  $^1\text{H}$  NMR digestion of MTV-UiO-66-E.

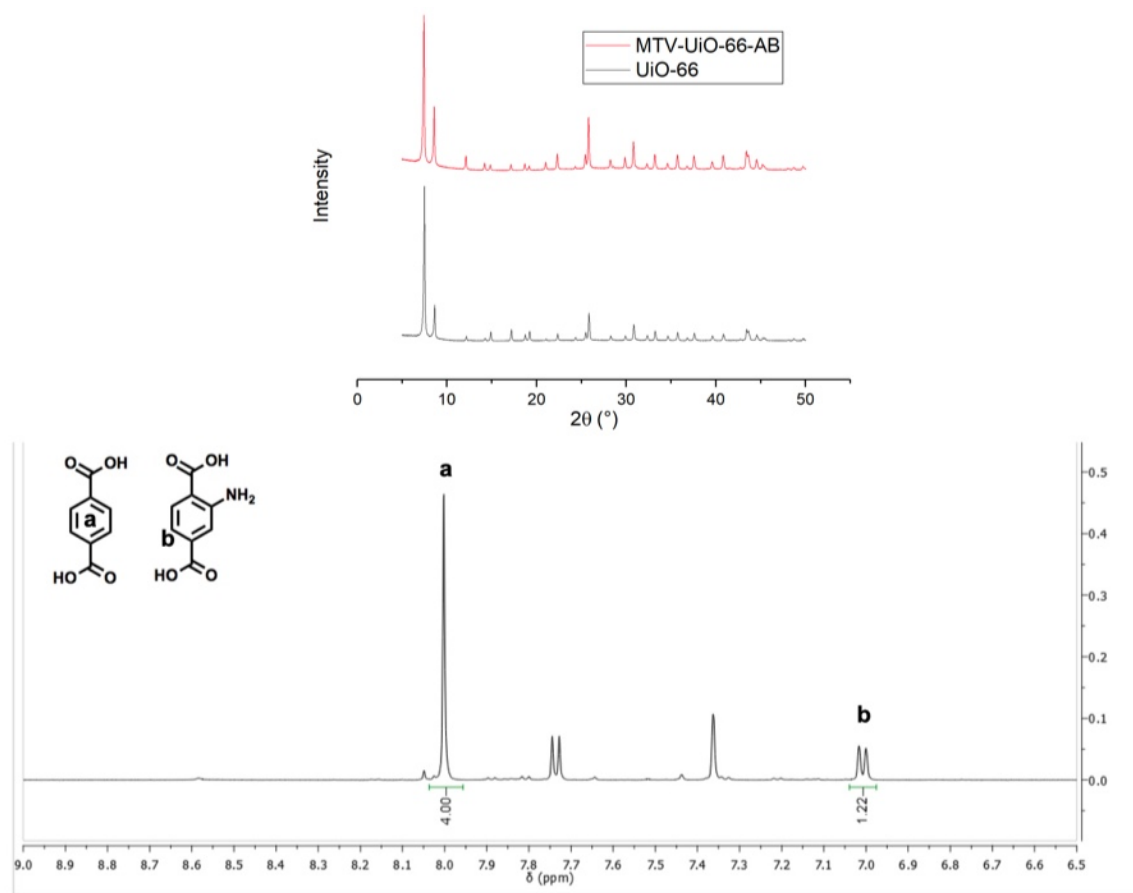

**Figure S6.** *Top:* PXR of MTV-UiO-66-AB. *Bottom:* <sup>1</sup>H NMR digestion of MTV-UiO-66-AB.

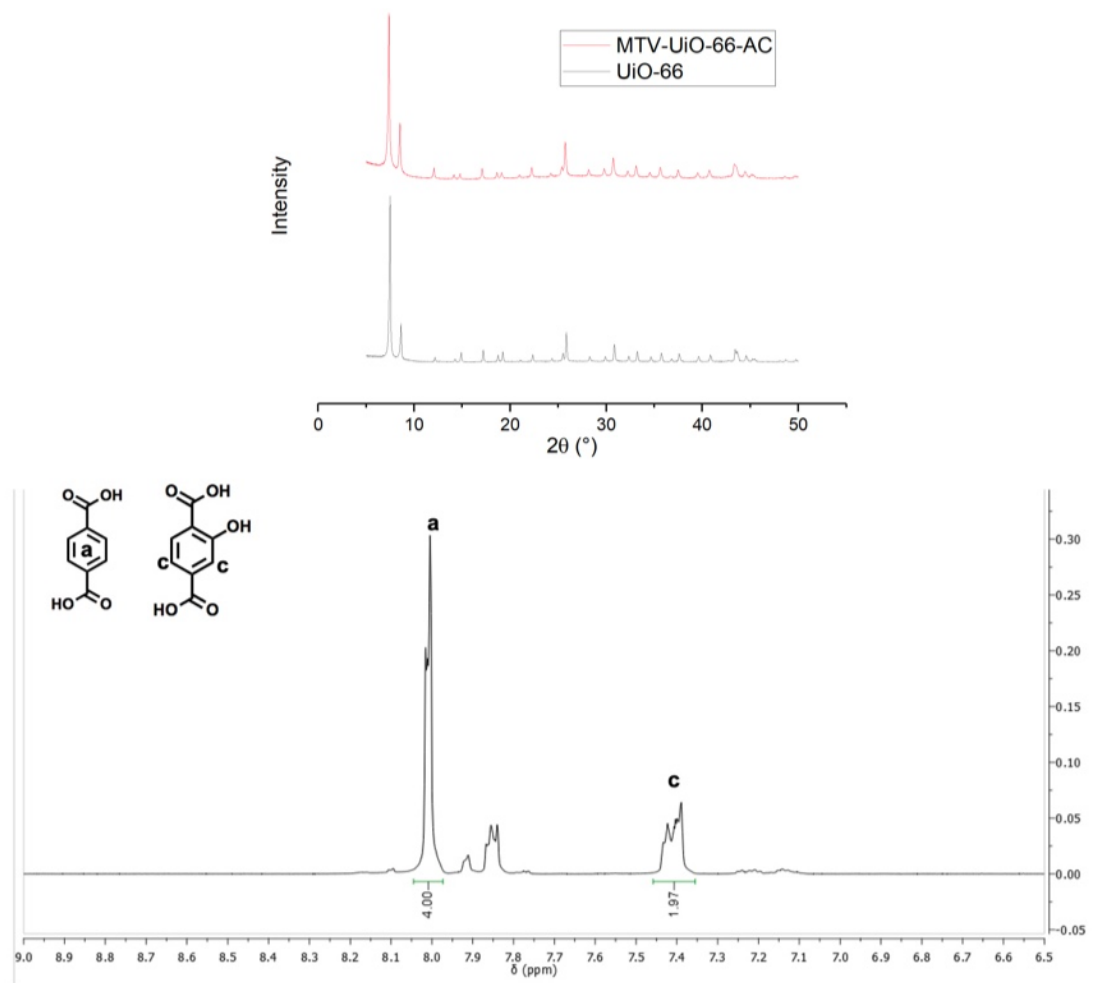

**Figure S7.** *Top:* PXRD and SEM of MTV-UiO-66-AC. *Bottom:*  $^1\text{H}$  NMR digestion of MTV-UiO-66-AC.

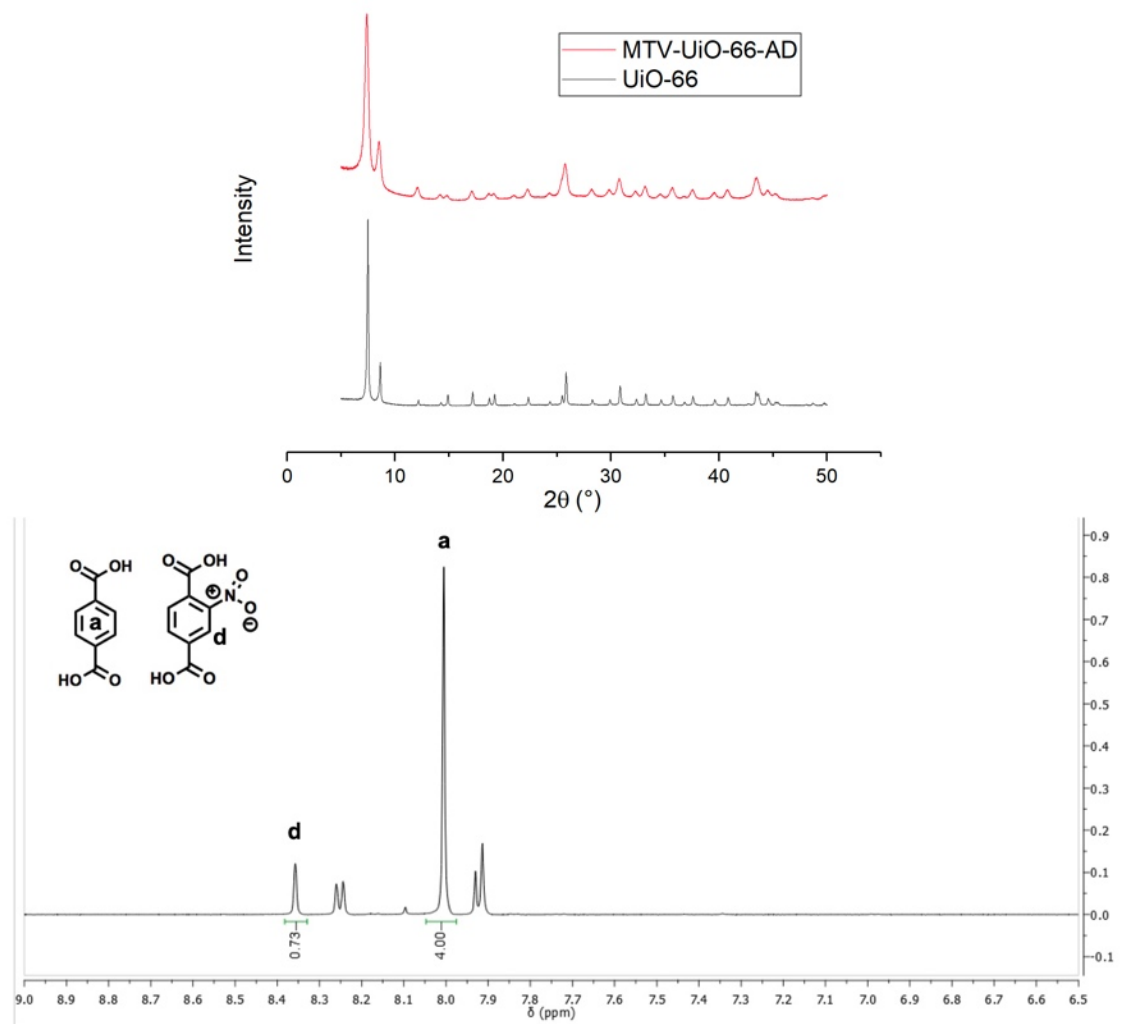

**Figure S8.** *Top:* PXRD of MTV-UiO-66-AD. *Bottom:*  $^1\text{H}$  NMR digestion of MTV-UiO-66-AD.

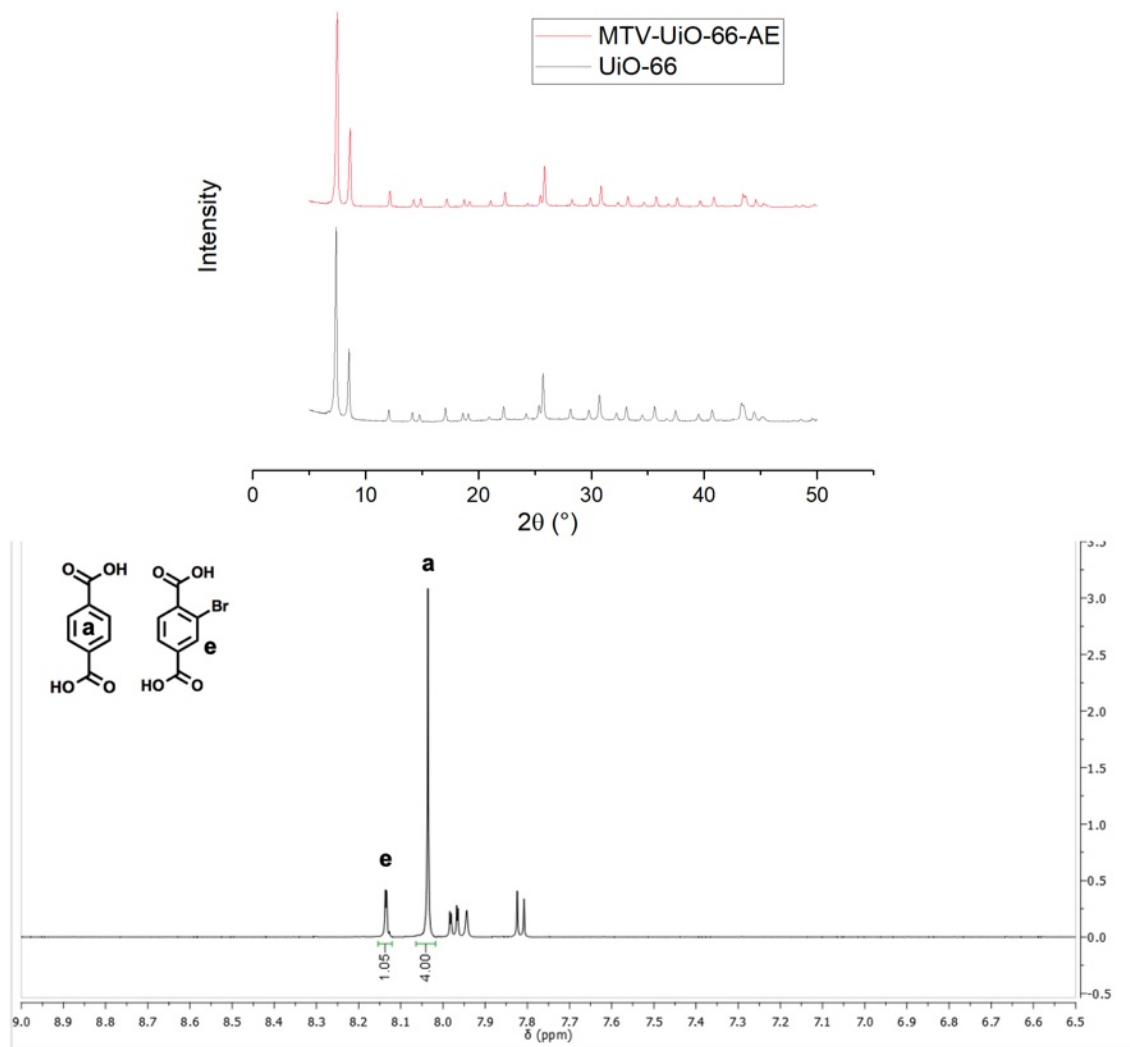

**Figure S9.** *Top:* PXRD of MTV-UiO-66-AE. *Bottom:*  $^1\text{H}$  NMR digestion of MTV-UiO-66-AE.

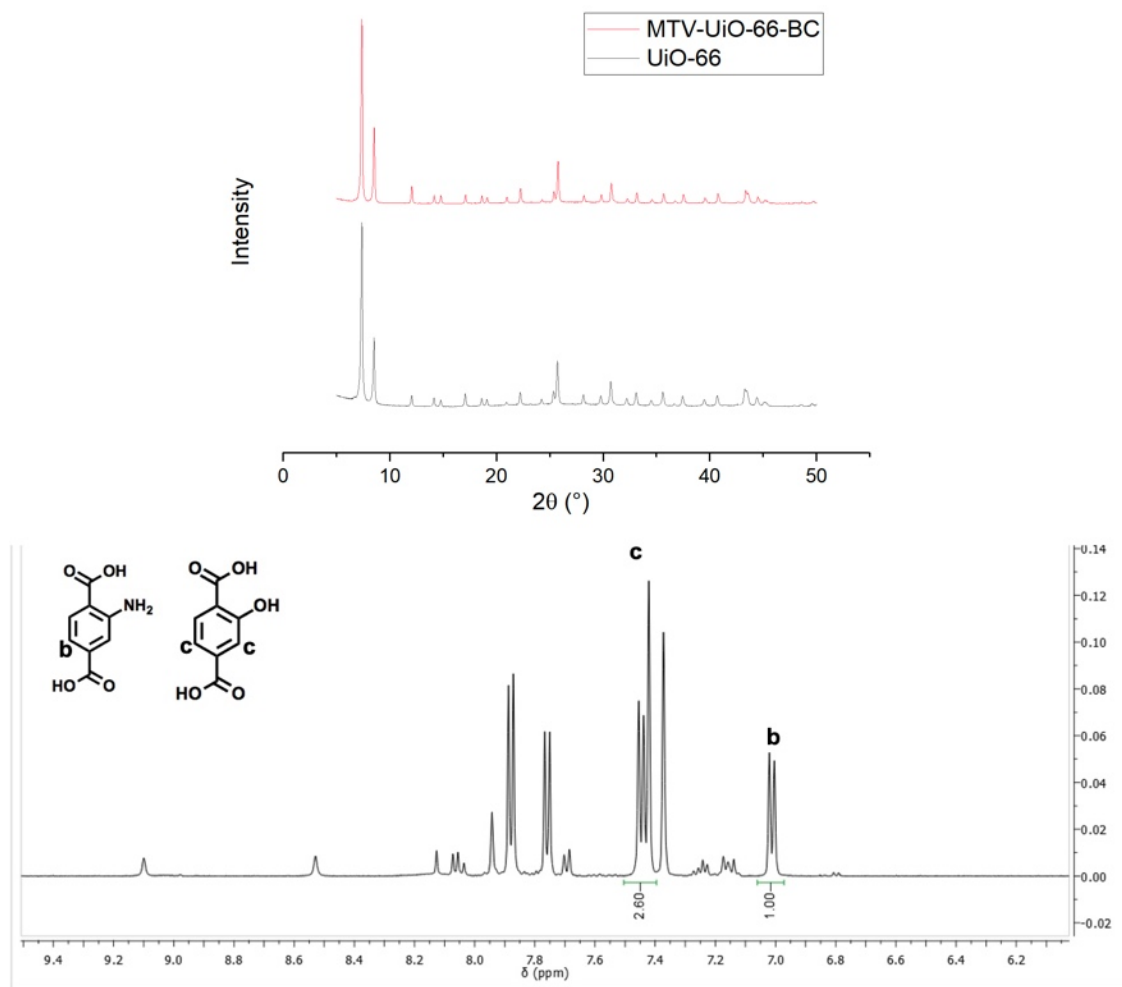

**Figure S10.** *Top:* PXRD of MTV-UiO-66-BC. *Bottom:*  $^1\text{H}$  NMR digestion of MTV-UiO-66-BC.



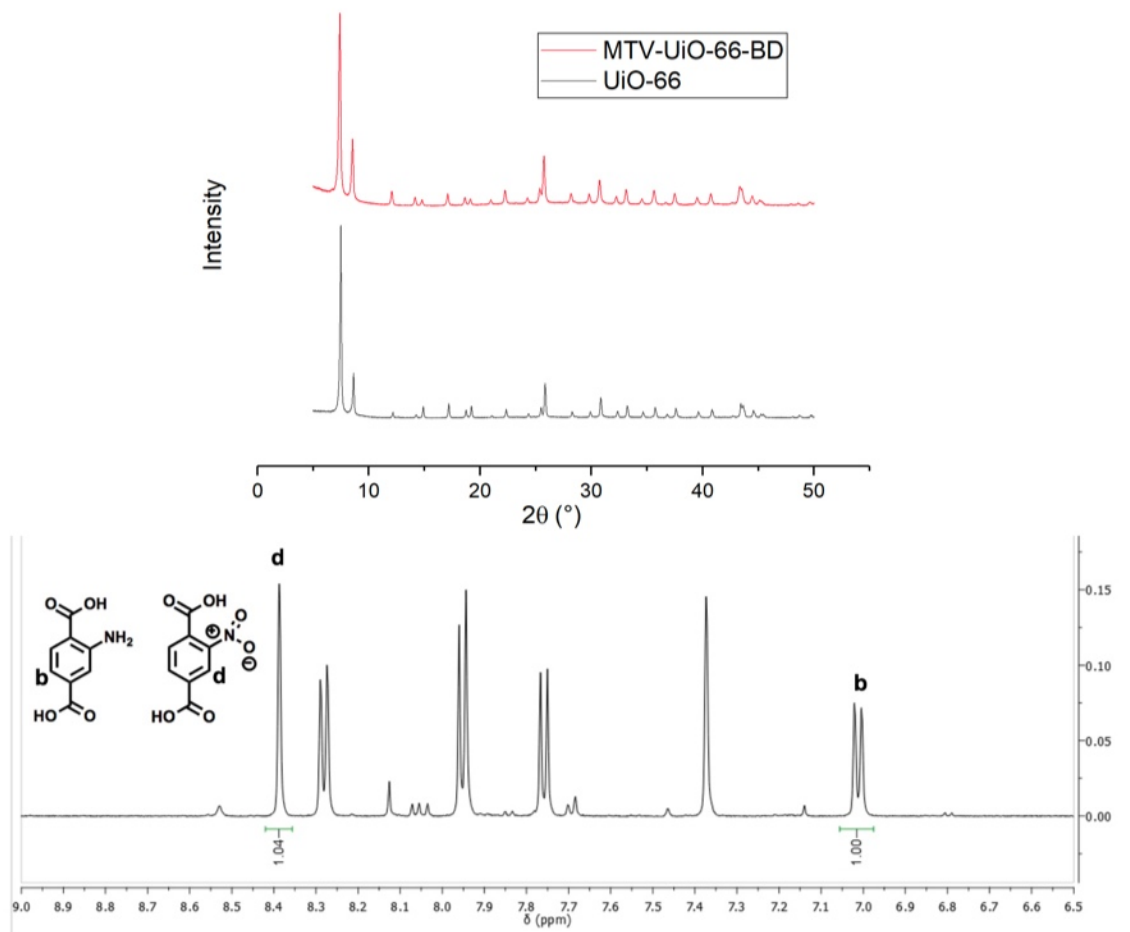

**Figure S11.** *Top:* PXRD of MTV-UiO-66-BD. *Bottom:*  $^1\text{H}$  NMR digestion of MTV-UiO-66-BD.

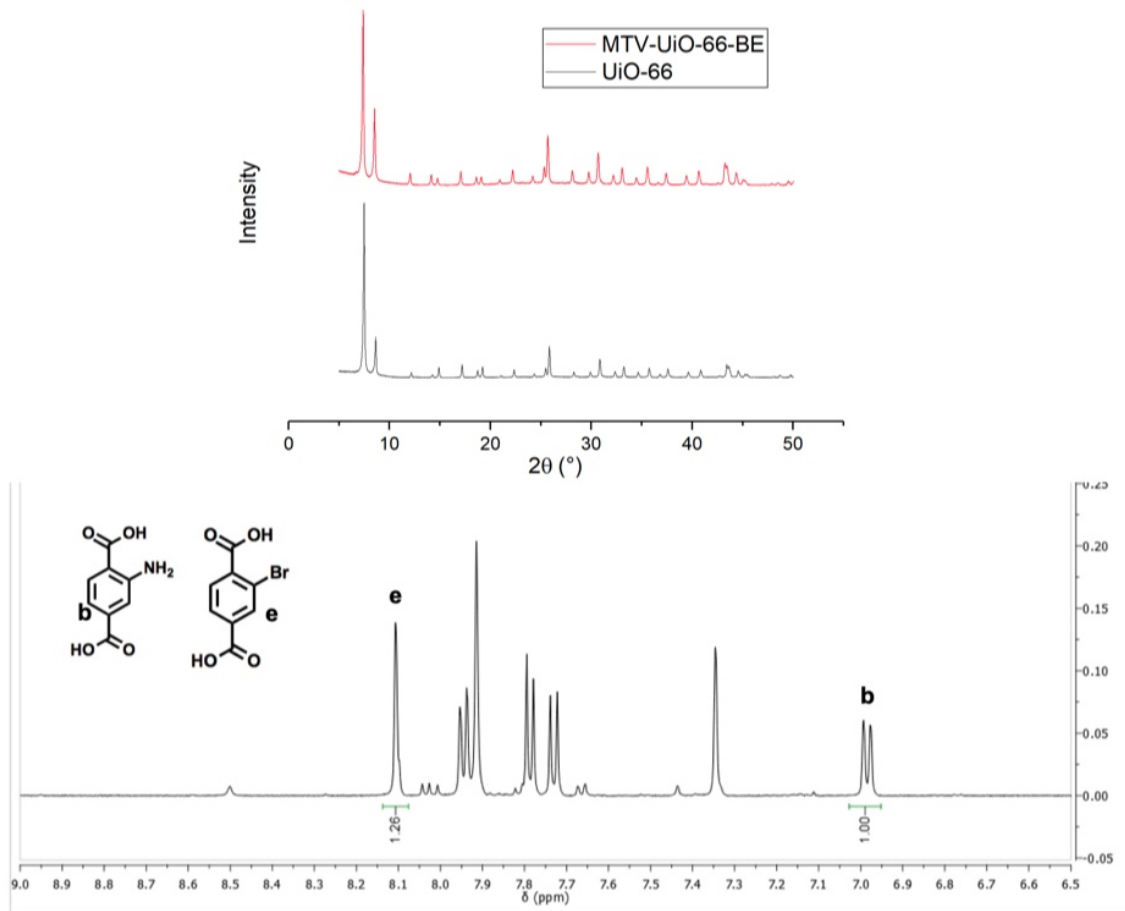

**Figure S12.** *Top:* PXRD of MTV-UiO-66-BE. *Bottom:*  $^1\text{H}$  NMR digestion of MTV-UiO-66-BE.

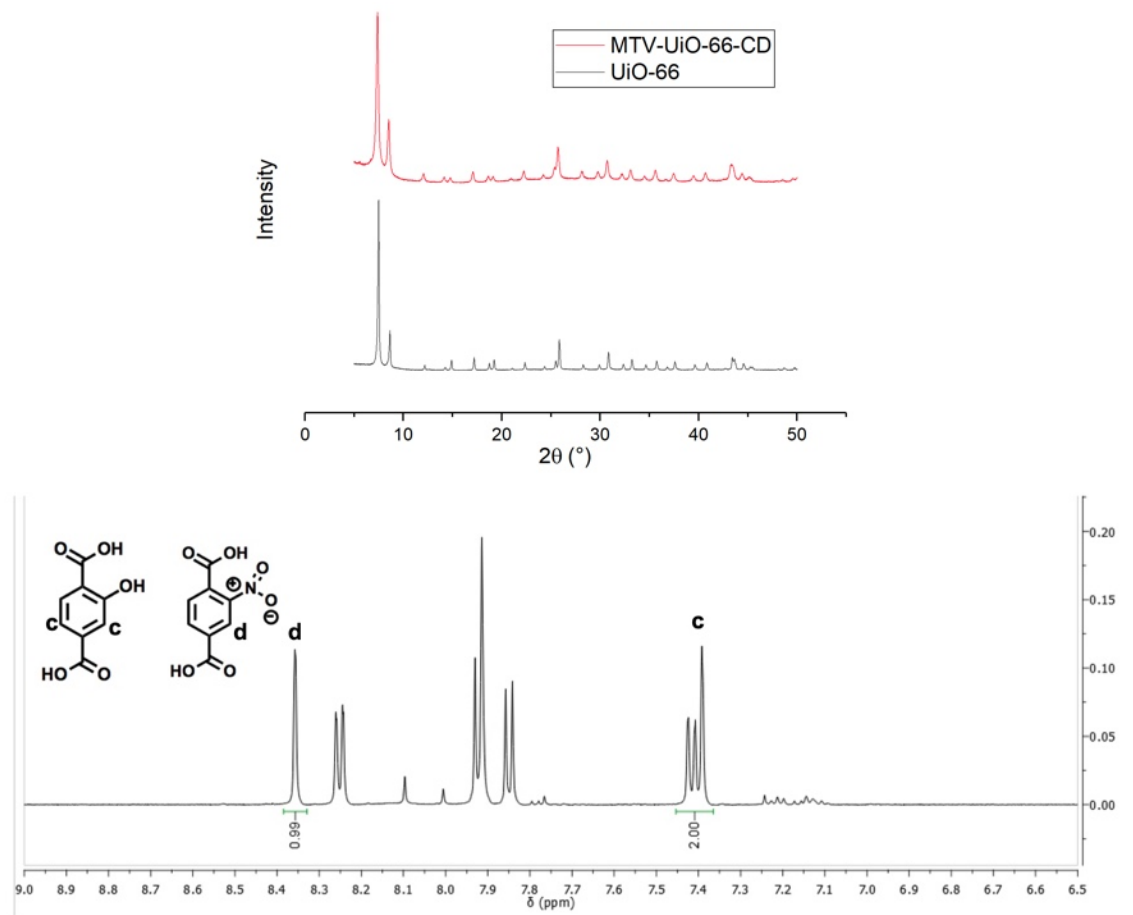

**Figure S13.** *Top:* PXRD of MTV-UiO-66-CD. *Bottom:* <sup>1</sup>H NMR digestion of MTV-UiO-66-CD.

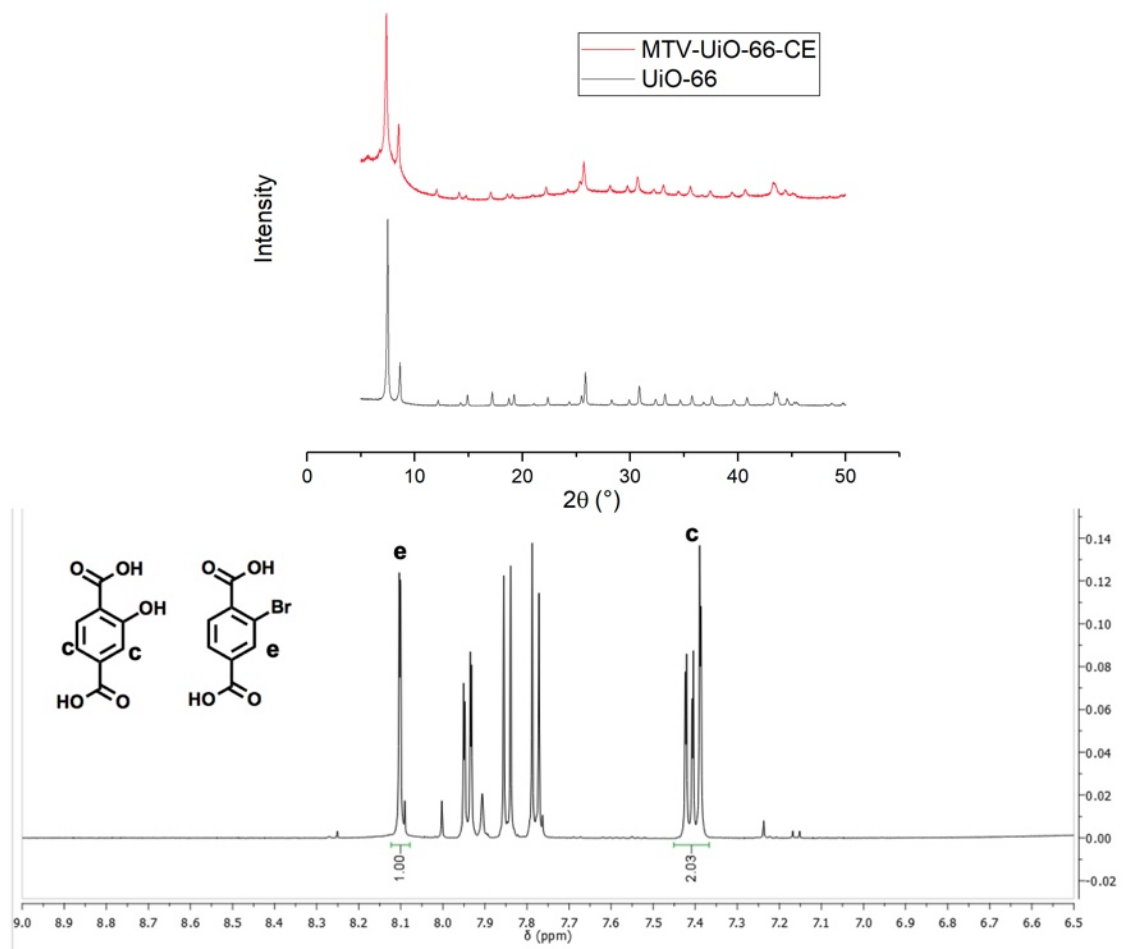

**Figure S14.** *Top:* PXR of MTV-UiO-66-CE. *Bottom:*  $^1\text{H}$  NMR digestion of MTV-UiO-66-CE.

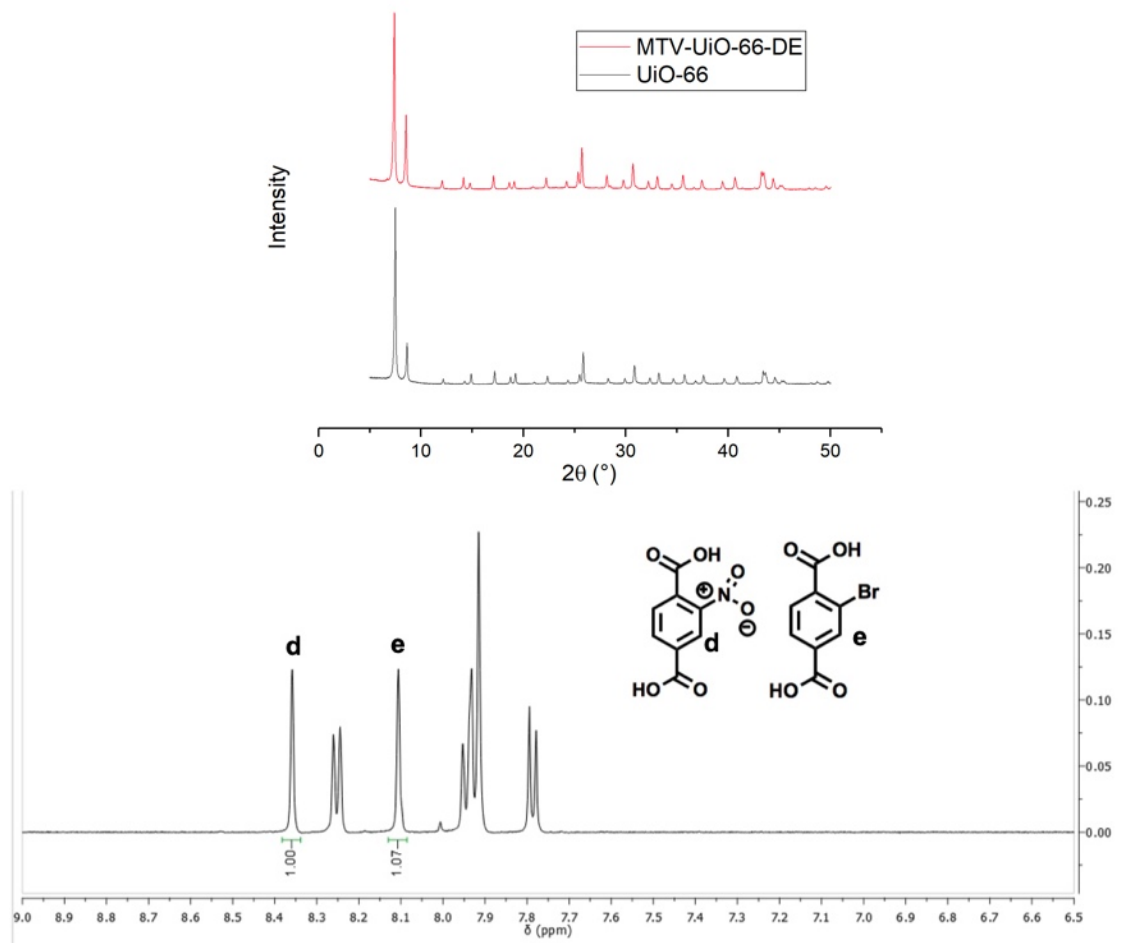

**Figure S15.** *Top:* PXRD of MTV-UiO-66-DE. *Bottom:* <sup>1</sup>H NMR digestion of MTV-UiO-66-DE.

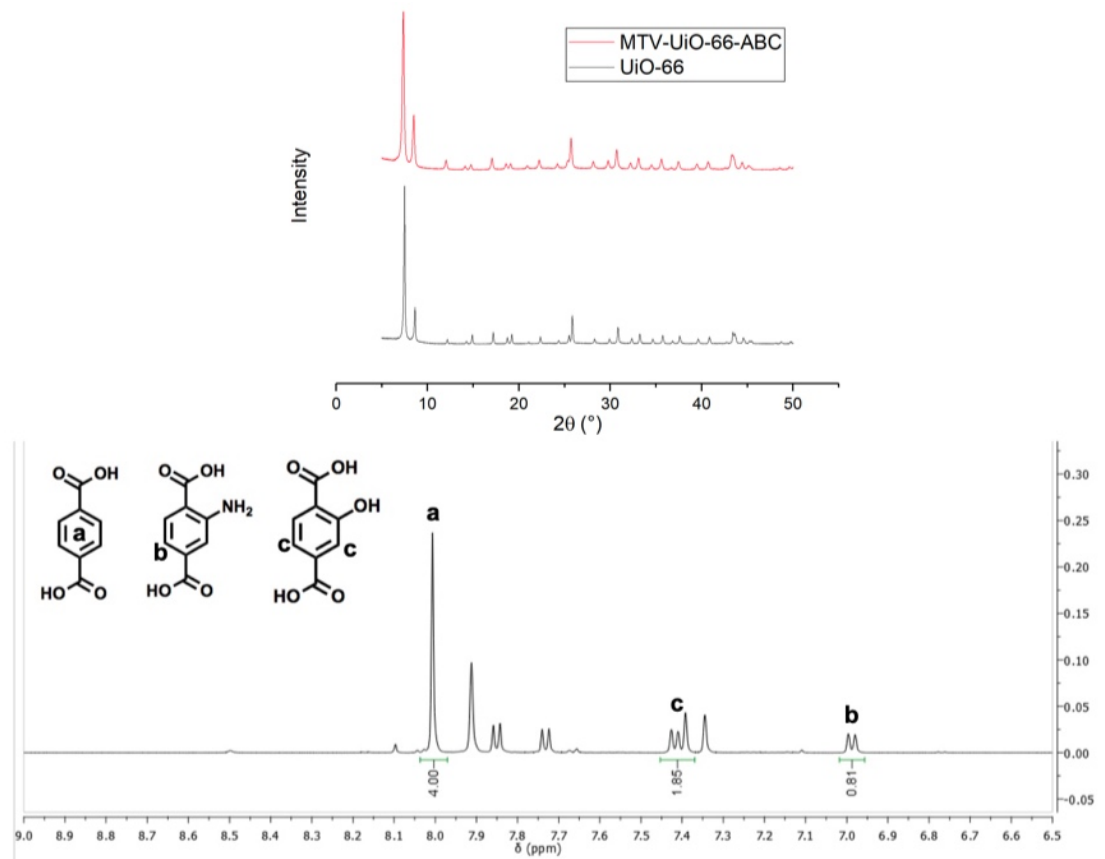

**Figure S16.** *Top:* PXRD of MTV-UiO-66-ABC. *Bottom:*  $^1\text{H}$  NMR digestion of MTV-UiO-66-ABC.

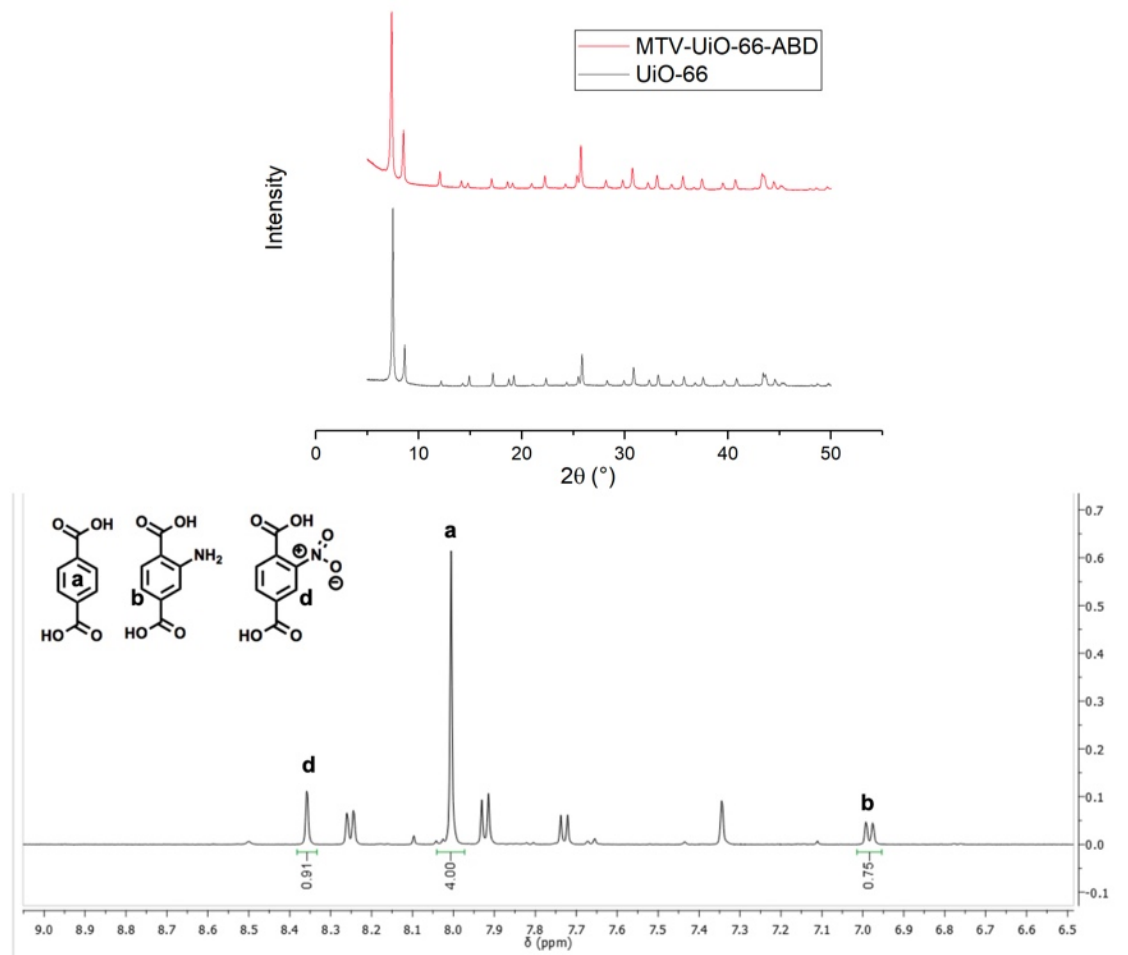

**Figure S17.** *Top:* PXRD of MTV-UiO-66-ABD. *Bottom:*  $^1\text{H}$  NMR digestion of MTV-UiO-66-ABD.

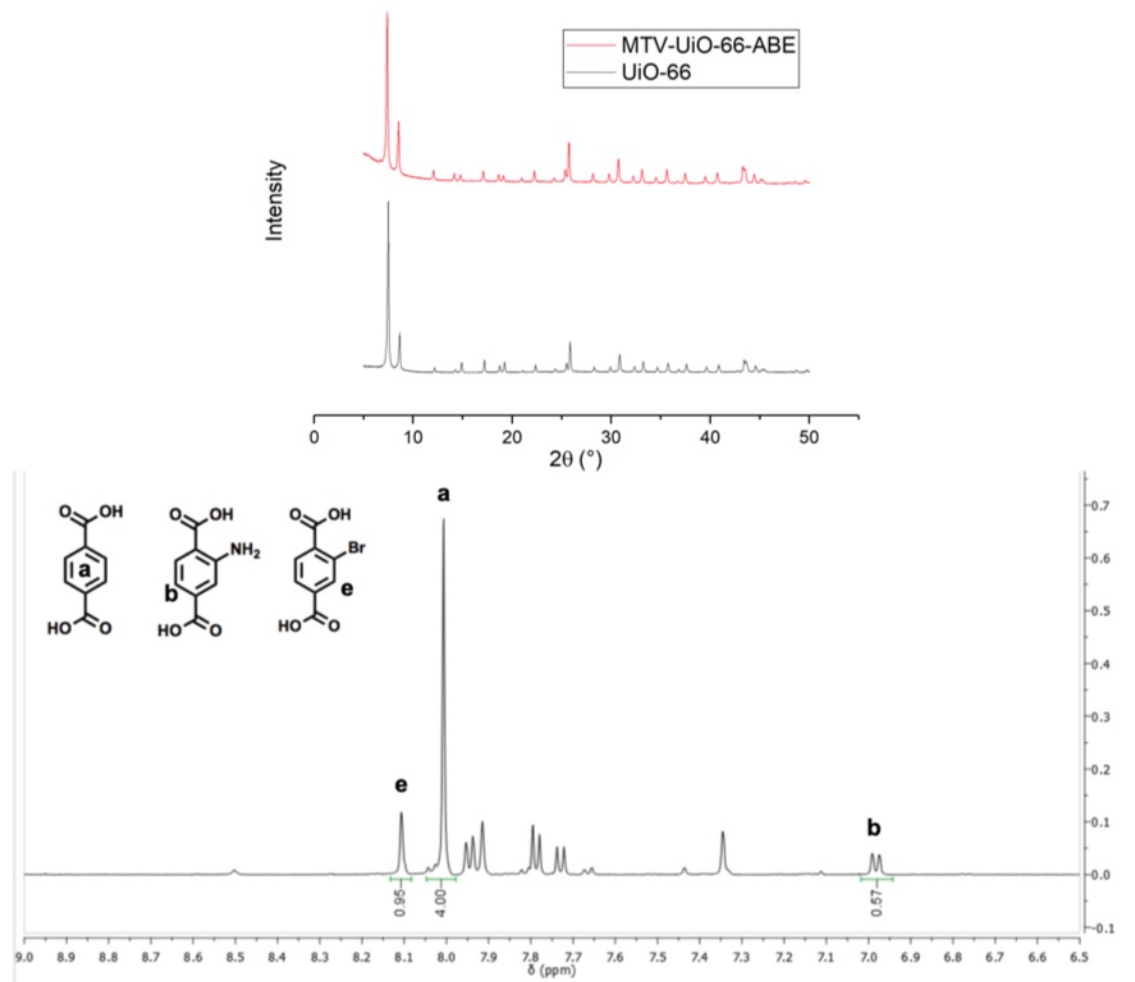

**Figure S18.** *Top:* PXRD of MTV-UiO-66-ABE. *Bottom:*  $^1\text{H}$  NMR digestion of MTV-UiO-66-ABE.



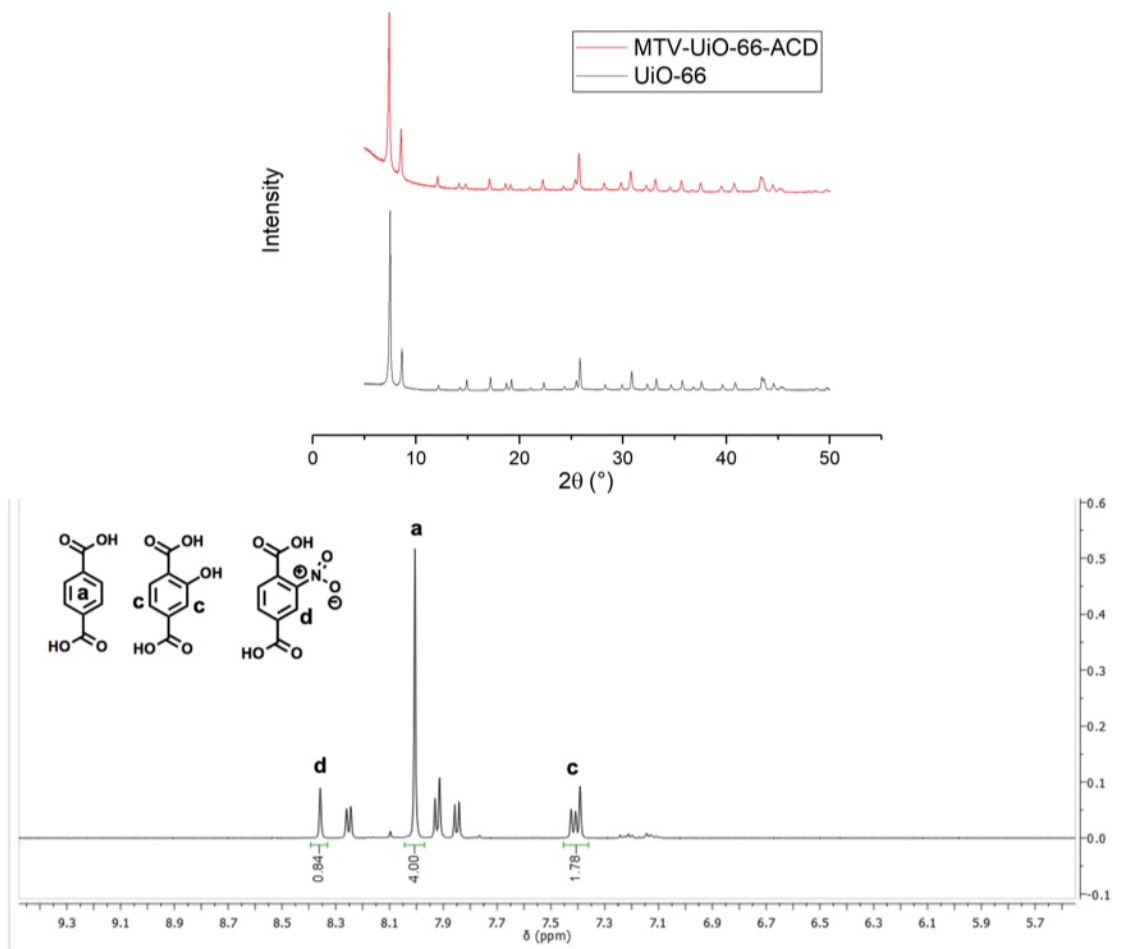

**Figure S19.** *Top:* PXRD of MTV-UiO-66-ACD. *Bottom:*  $^1\text{H}$  NMR digestion of MTV-UiO-66-ACD.

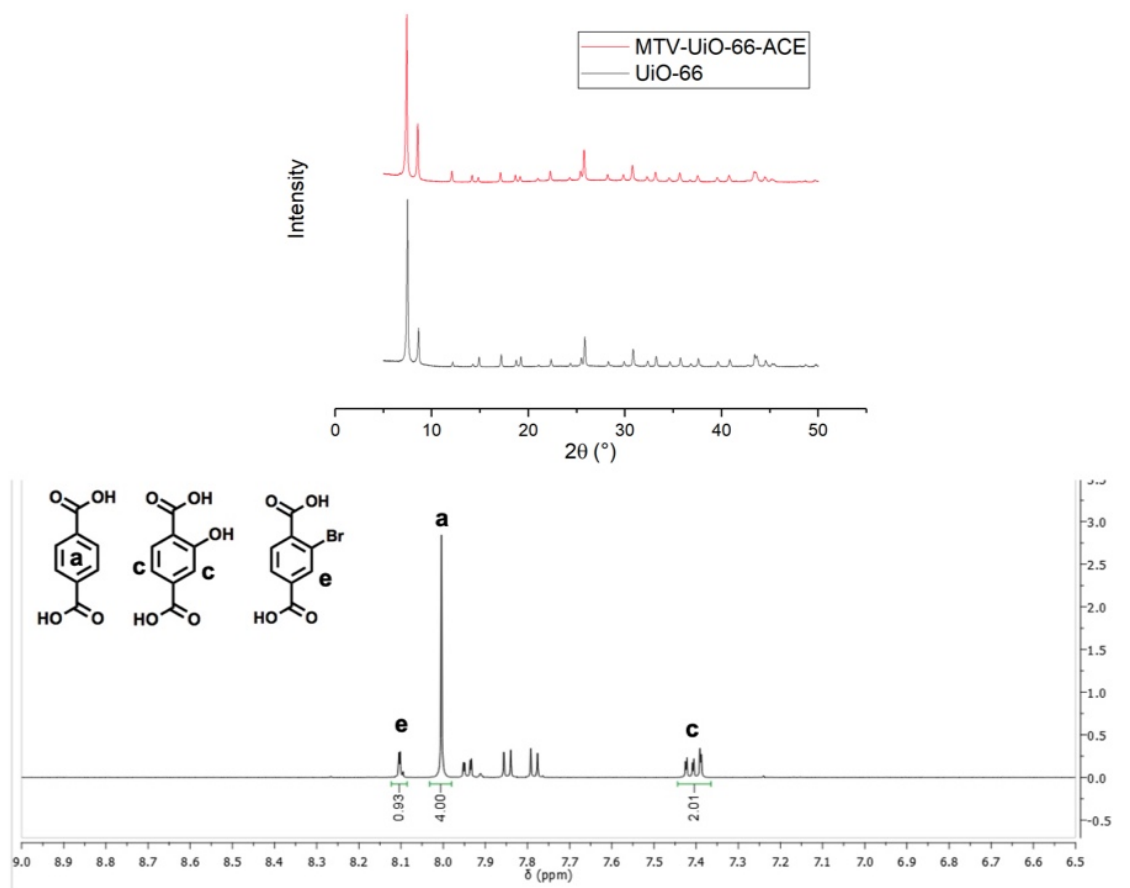

**Figure S20.** *Top:* PXRD of MTV-UiO-66-ACE. *Bottom:*  $^1\text{H}$  NMR digestion of MTV-UiO-66-ACE.

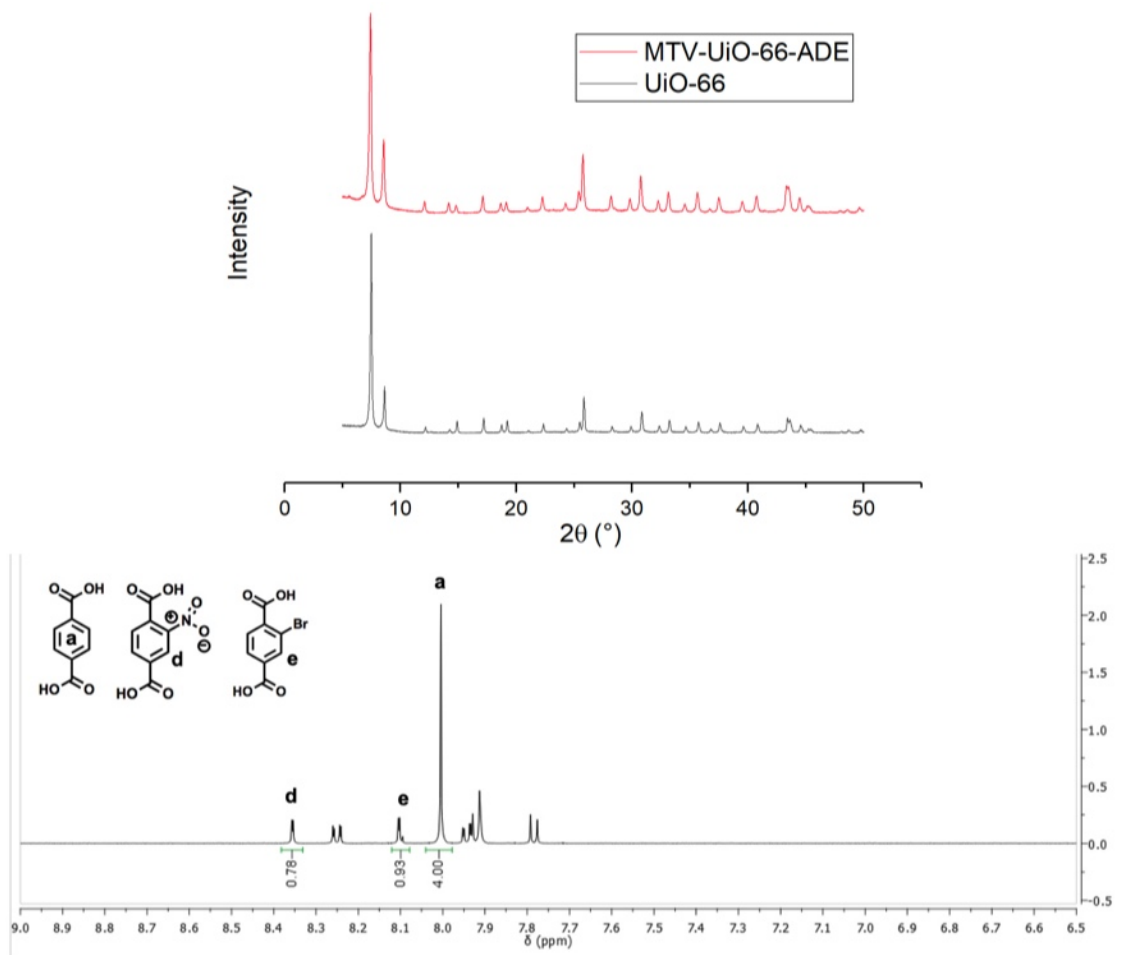

**Figure S21.** *Top:* PXRD of MTV-UiO-66-ADE. *Bottom:*  $^1\text{H}$  NMR digestion of MTV-UiO-66-ADE.

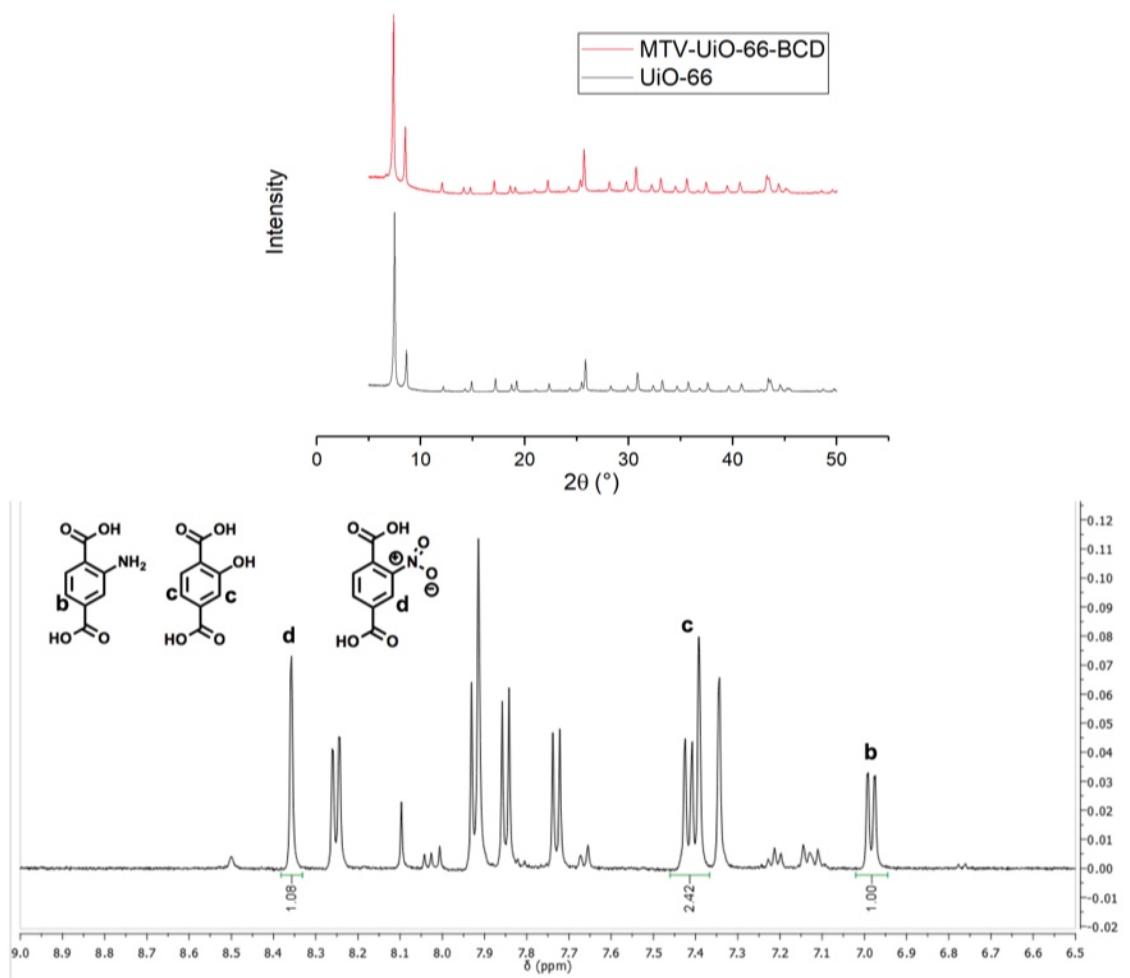

**Figure S22.** *Top:* PXRD of MTV-UiO-66-BCD. *Bottom:*  $^1\text{H}$  NMR digestion of MTV-UiO-66-BCD.

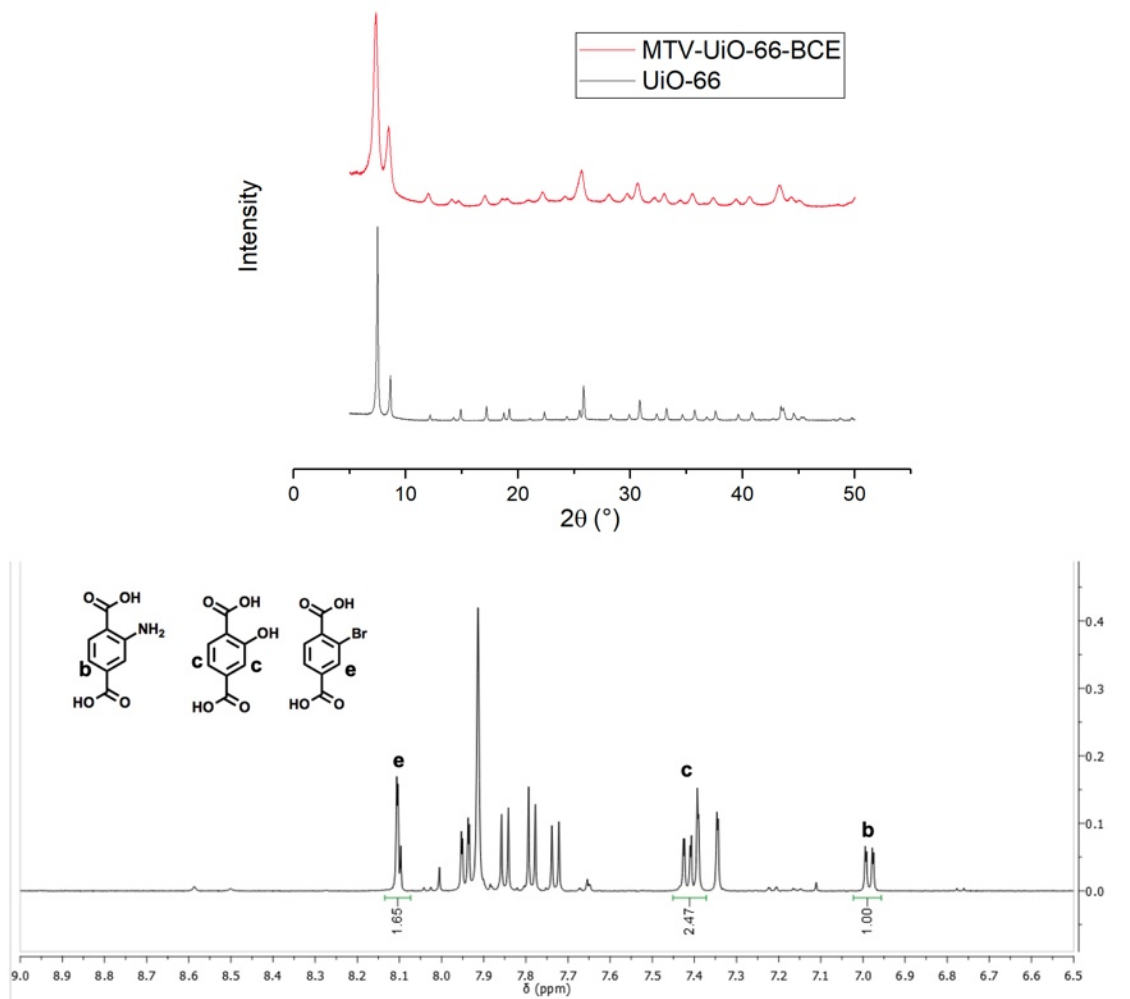

**Figure S23.** *Top:* PXRD of MTV-UiO-66-BCE. *Bottom:*  $^1\text{H}$  NMR digestion of MTV-UiO-66-BCE.

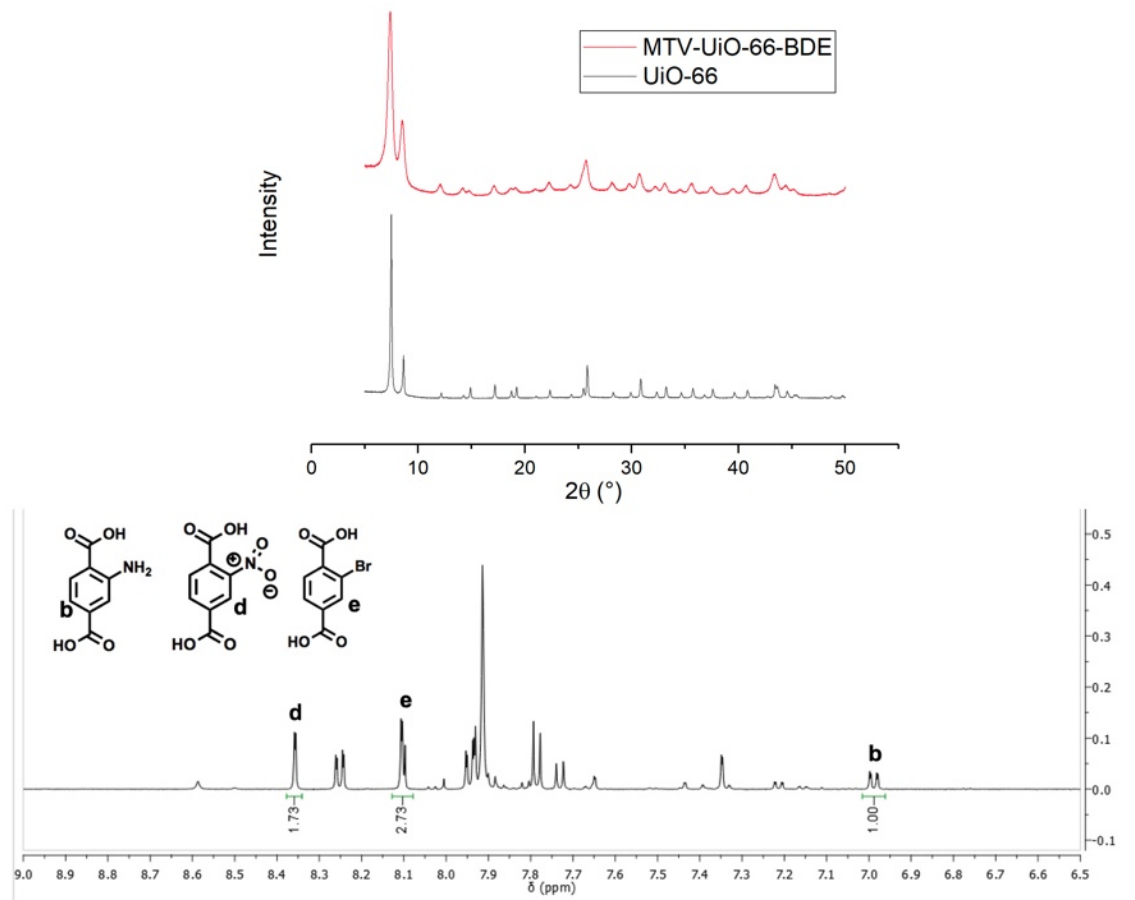

**Figure S24.** *Top:* PXRD of MTV-UiO-66-BDE. *Bottom:*  $^1\text{H}$  NMR digestion of MTV-UiO-66-BDE.

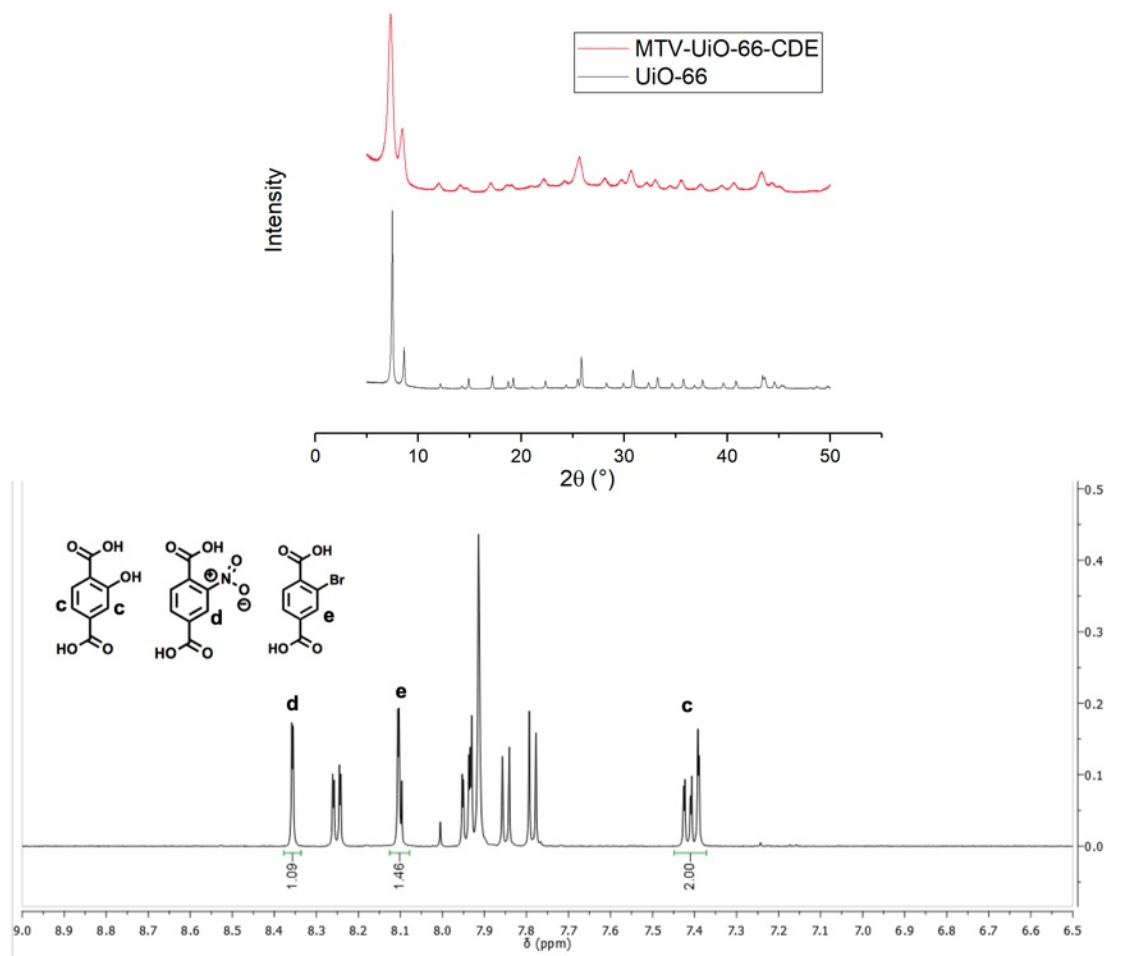

**Figure S25.** *Top:* PXR of MTV-UiO-66-CDE. *Bottom:*  $^1\text{H}$  NMR digestion of MTV-UiO-66-CDE.

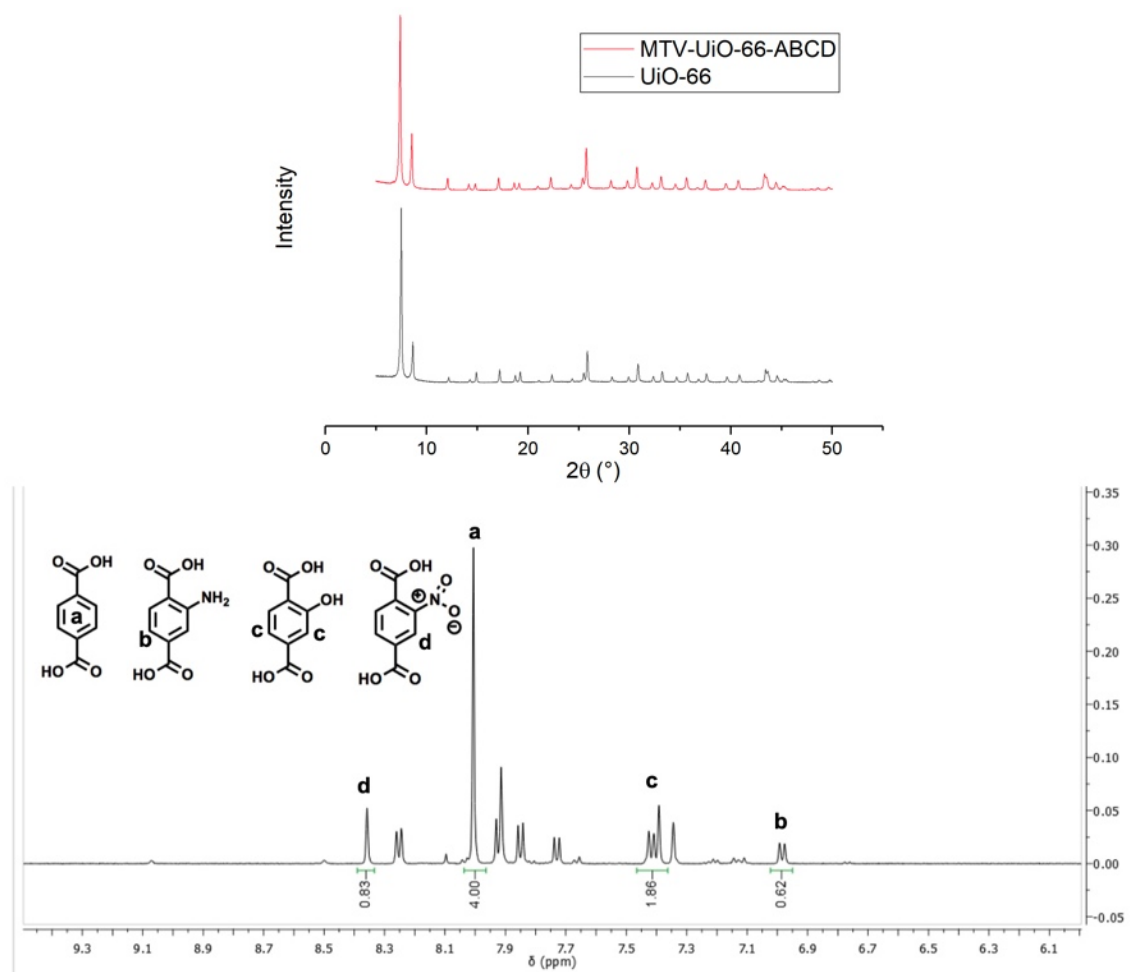

**Figure S26.** *Top:* PXRD of MTV-UiO-66-ABCD. *Bottom:*  $^1\text{H}$  NMR digestion of MTV-UiO-66-ABCD.



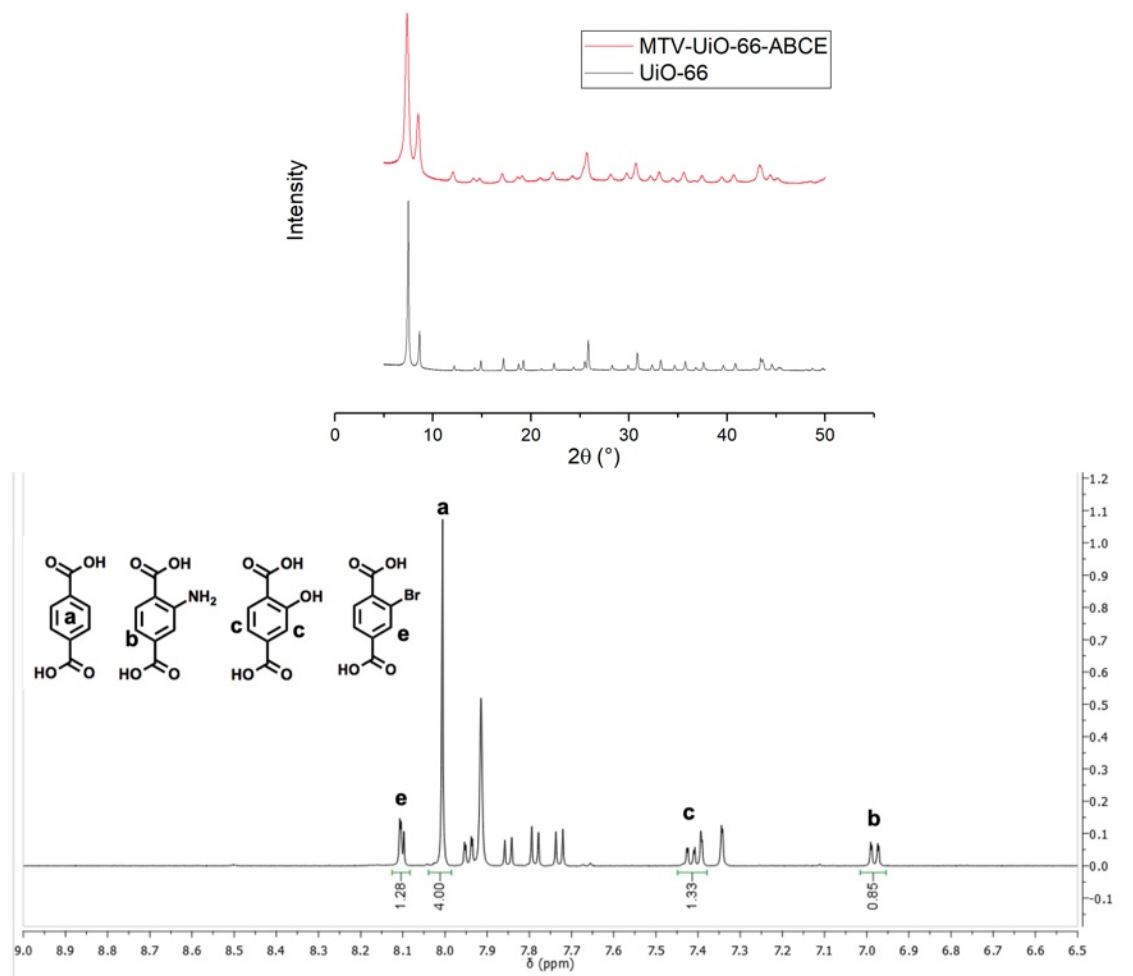

**Figure S27.** *Top:* PXRD of MTV-UiO-66-ABCE. *Bottom:*  $^1\text{H}$  NMR digestion of MTV-UiO-66-ABCE.

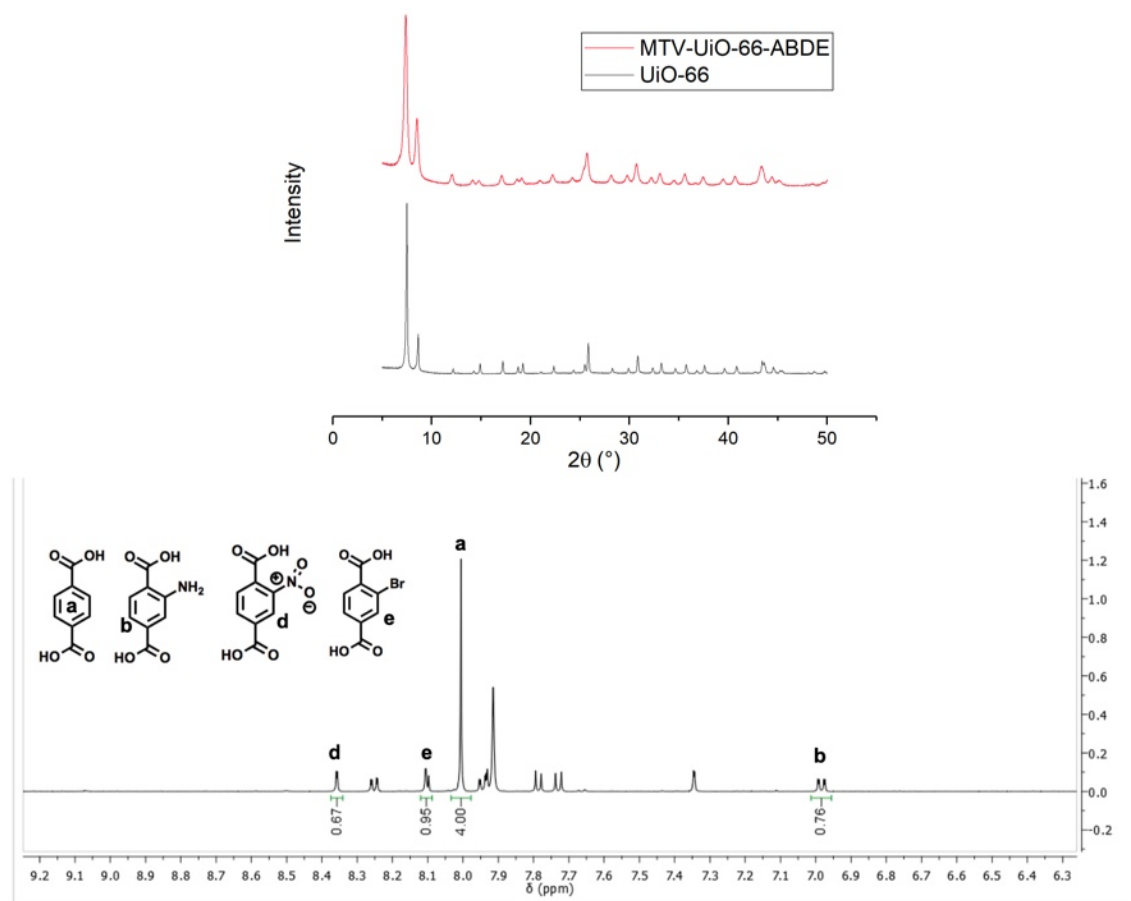

**Figure S28.** *Top:* PXRD of MTV-UiO-66-ABDE. *Bottom:*  $^1\text{H}$  NMR digestion of MTV-UiO-66-ABDE.

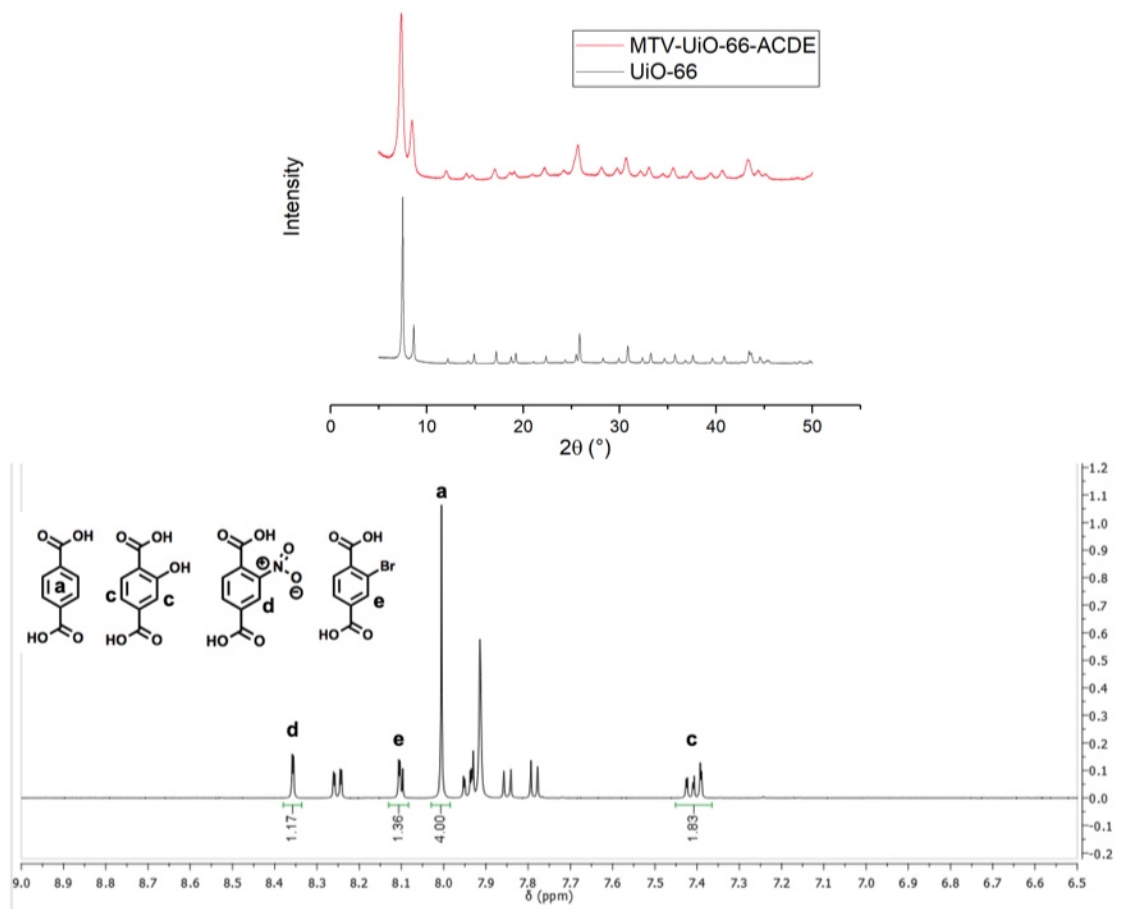

**Figure S29.** *Top:* PXR of MTV-UiO-66-ACDE. *Bottom:*  $^1\text{H}$  NMR digestion of MTV-UiO-66-ACDE.

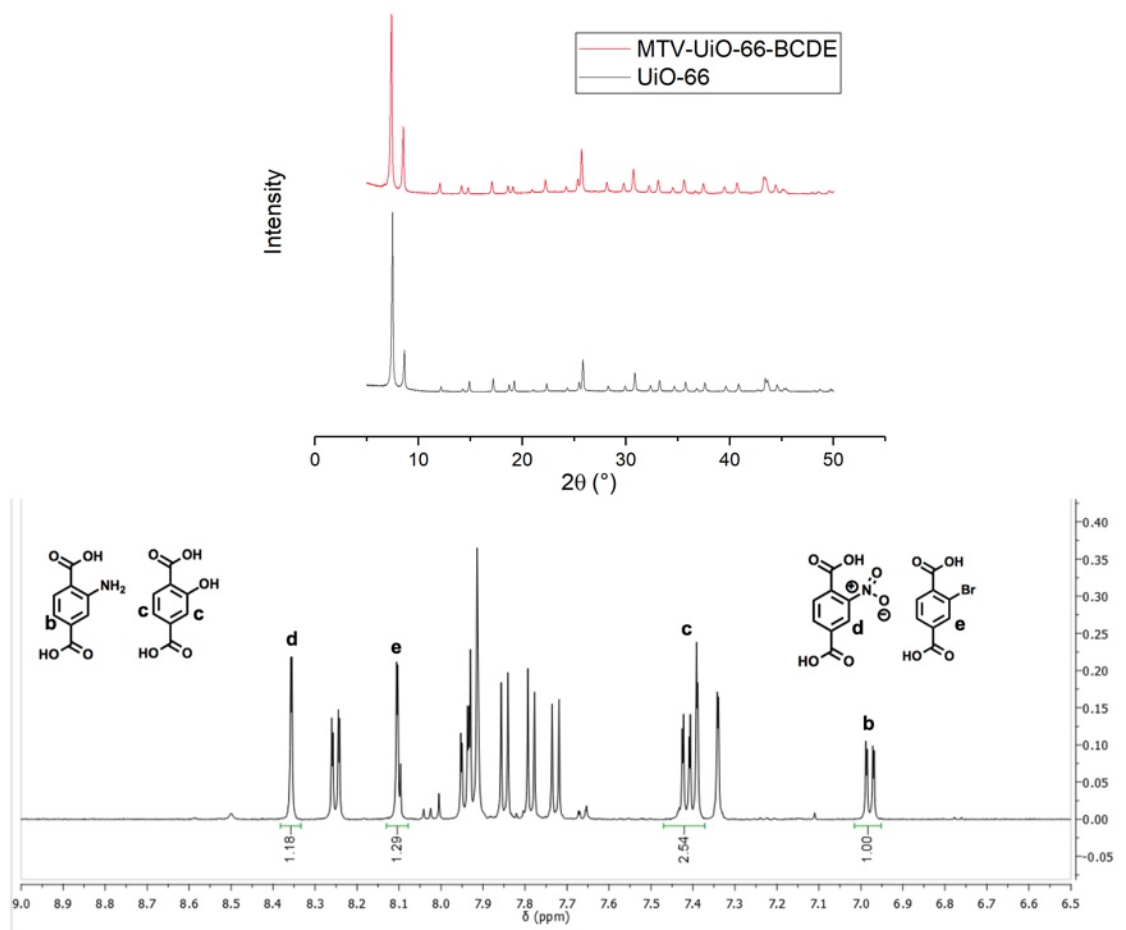

**Figure S30.** *Top:* PXRD of MTV-UiO-66-BCDE. *Bottom:* <sup>1</sup>H NMR digestion of MTV-UiO-66-BCDE.

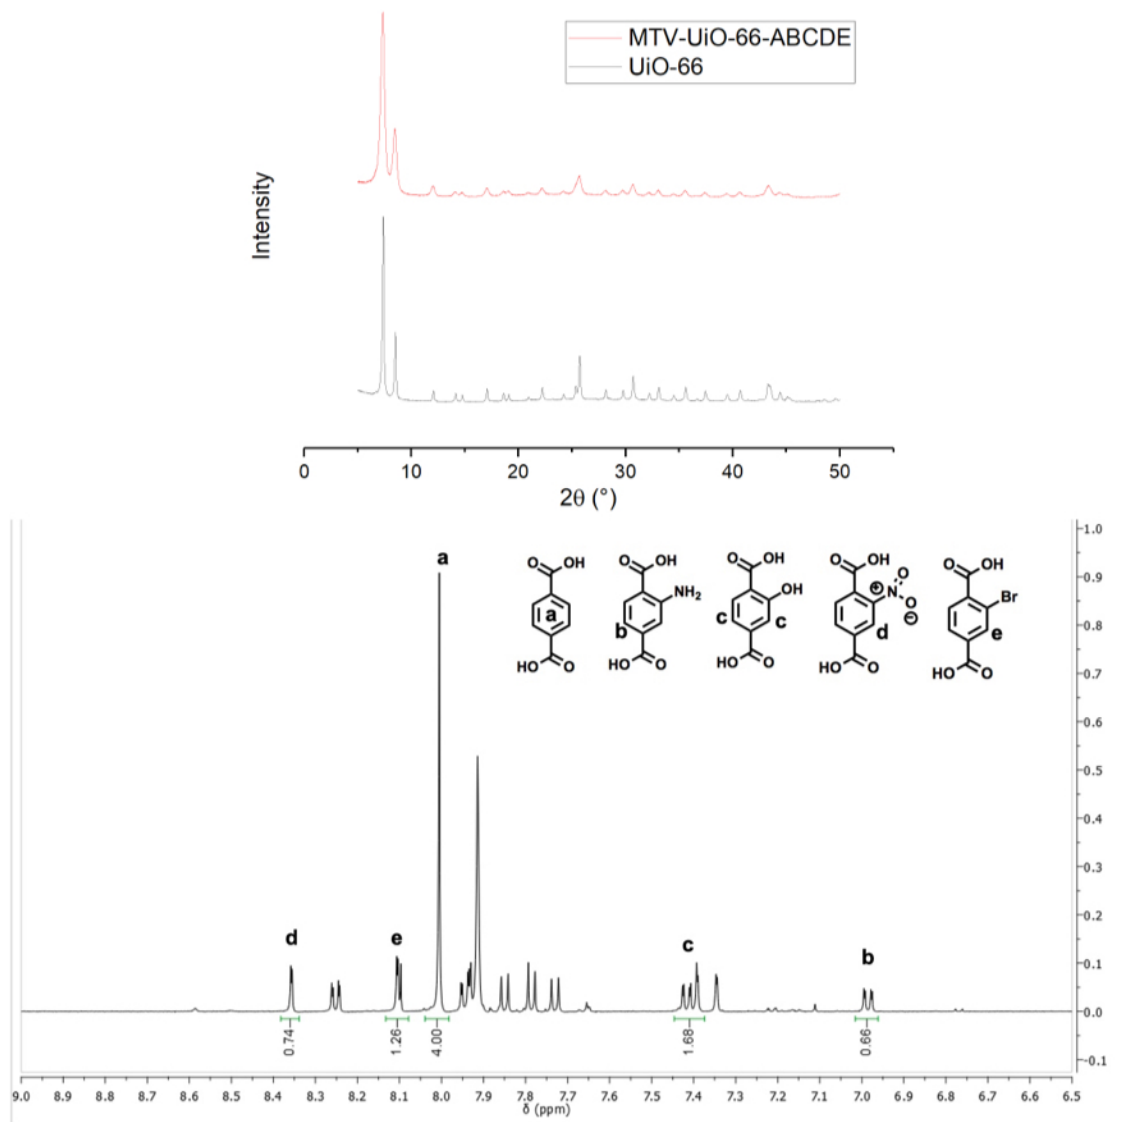

**Figure S31.** *Top:* PXRD of MTV-UiO-66-ABCDE. *Bottom:*  $^1\text{H}$  NMR digestion of MTV-UiO-66-ABCDE.

**Table S1.** Ratio of MOF ligands determined by  $^1\text{H}$  NMR and their respective stoichiometry in parentheses. The ratios are normalized to a value of one.

| MTV-UiO-66 MOF | (A)<br>BDC | (B)<br>NH <sub>2</sub> -BDC | (C)<br>OH-BDC | (D)<br>NO <sub>2</sub> -BDC | (E)<br>Br-BDC |
|----------------|------------|-----------------------------|---------------|-----------------------------|---------------|
| A              | 1.00 (1)   | N/A                         | N/A           | N/A                         | N/A           |
| B              | N/A        | 1.00 (1)                    | N/A           | N/A                         | N/A           |
| C              | N/A        | N/A                         | 1.00 (1)      | N/A                         | N/A           |
| D              | N/A        | N/A                         | N/A           | 1.00 (1)                    | N/A           |
| E              | N/A        | N/A                         | N/A           | N/A                         | 1.00 (1)      |
| AB             | 0.45 (1)   | 0.55 (1)                    | N/A           | N/A                         | N/A           |
| AC             | 0.50 (1)   | N/A                         | 0.50 (1)      | N/A                         | N/A           |
| AD             | 0.58 (1)   | N/A                         | N/A           | 0.42 (1)                    | N/A           |
| AE             | 0.49 (1)   | N/A                         | N/A           | N/A                         | 0.51 (1)      |
| BC             | N/A        | 0.44 (1)                    | 0.56 (1)      | N/A                         | N/A           |
| BD             | N/A        | 0.49 (1)                    | N/A           | 0.51 (1)                    | N/A           |
| BE             | N/A        | 0.44 (1)                    | N/A           | N/A                         | 0.56 (1)      |
| CD             | N/A        | N/A                         | 0.50 (1)      | 0.50 (1)                    | N/A           |
| CE             | N/A        | N/A                         | 0.51 (1)      | N/A                         | 0.49 (1)      |
| DE             | N/A        | N/A                         | N/A           | 0.48 (1)                    | 0.52 (1)      |
| ABC            | 0.36 (1)   | 0.30 (1)                    | 0.34 (1)      | N/A                         | N/A           |
| ABD            | 0.38 (1)   | 0.28 (1)                    | N/A           | 0.34 (1)                    | N/A           |
| ABE            | 0.40 (1)   | 0.23 (1)                    | N/A           | N/A                         | 0.37 (1)      |
| ACD            | 0.36 (1)   | N/A                         | 0.33 (1)      | 0.31 (1)                    | N/A           |
| ACE            | 0.34 (1)   | N/A                         | 0.34 (1)      | N/A                         | 0.32 (1)      |
| ADE            | 0.37 (1)   | N/A                         | N/A           | 0.29 (1)                    | 0.34 (1)      |
| BCD            | N/A        | 0.30 (1)                    | 0.37 (1)      | 0.33 (1)                    | N/A           |
| BCE            | N/A        | 0.26 (1)                    | 0.32 (1)      | N/A                         | 0.42 (1)      |
| BDE            | N/A        | 0.18 (1)                    | N/A           | 0.32 (1)                    | 0.50 (1)      |
| CDE            | N/A        | N/A                         | 0.28 (1)      | 0.31 (1)                    | 0.41 (1)      |
| ABCD           | 0.30 (1)   | 0.18 (1)                    | 0.27 (1)      | 0.25 (1)                    | N/A           |
| ABCE           | 0.26 (1)   | 0.22 (1)                    | 0.18 (1)      | N/A                         | 0.34 (1)      |
| ABDE           | 0.30 (1)   | 0.22 (1)                    | N/A           | 0.20 (1)                    | 0.28 (1)      |
| ACDE           | 0.23 (1)   | N/A                         | 0.21 (1)      | 0.26 (1)                    | 0.30 (1)      |
| BCDE           | N/A        | 0.21 (1)                    | 0.27 (1)      | 0.25 (1)                    | 0.27 (1)      |
| ABCDE          | 0.22 (1)   | 0.15 (1)                    | 0.19 (1)      | 0.16 (1)                    | 0.28 (1)      |

## Scanning Electron Microscopy (SEM)

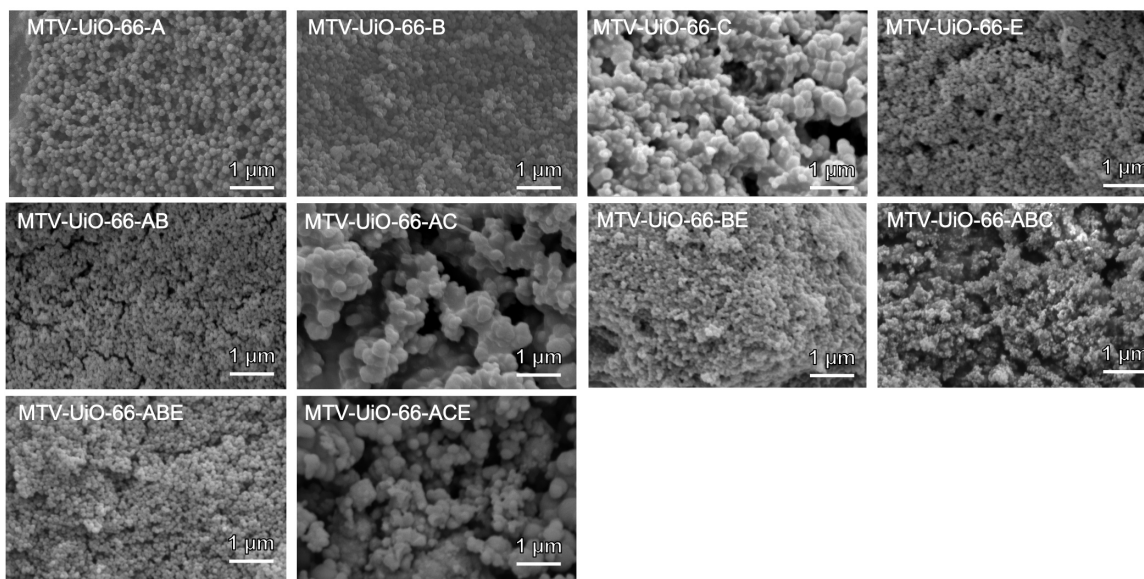

**Figure 32.** SEM images of MTV-UiO-66 MOFs.

## N<sub>2</sub> Sorption Isotherms

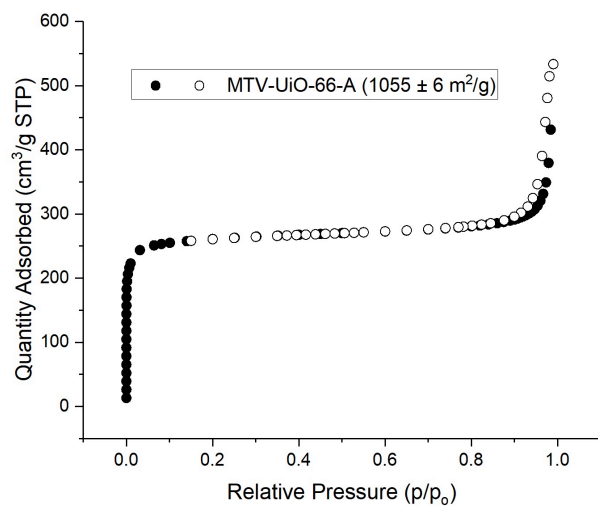

**Figure S33.** N<sub>2</sub> sorption isotherm for MTV-UiO-66-A.

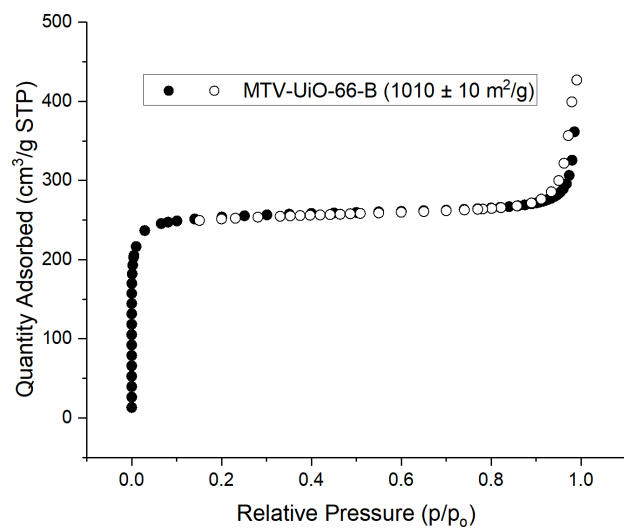

**Figure S34.** N<sub>2</sub> sorption isotherm for MTV-UiO-66-B.

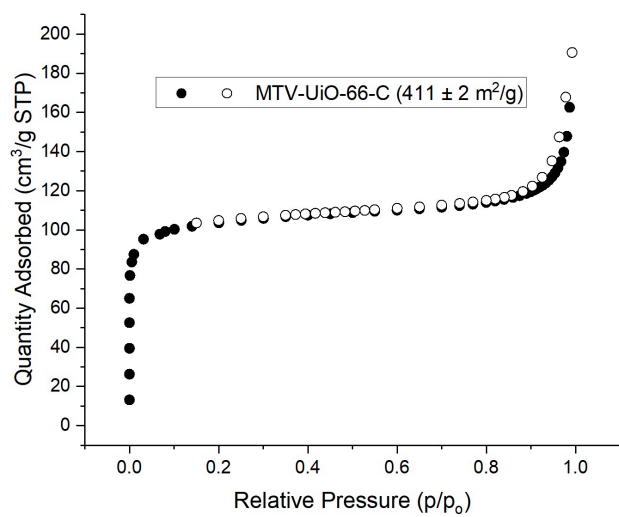

**Figure S35.** N<sub>2</sub> sorption isotherm for MTV-UiO-66-C.



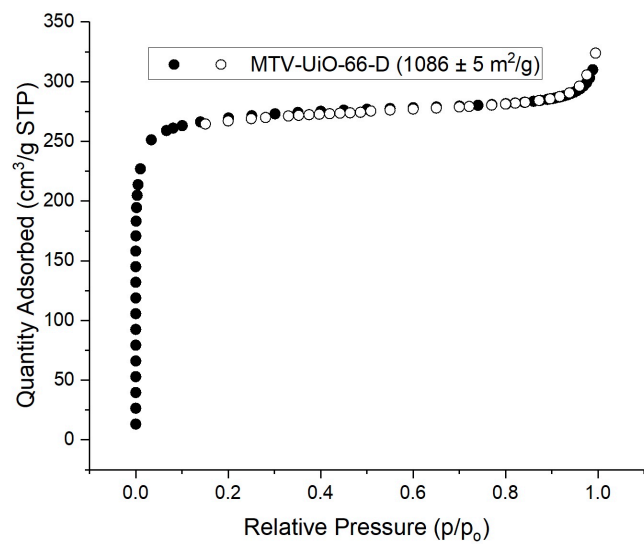

**Figure S36.** N<sub>2</sub> sorption isotherm for MTV-UiO-66-D.

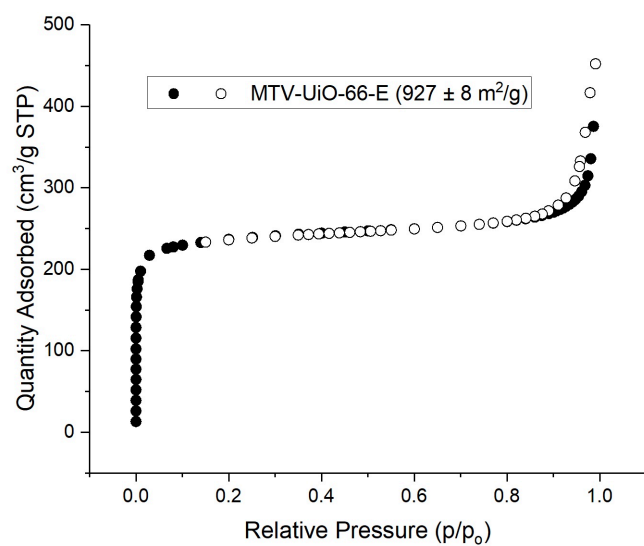

**Figure S37.** N<sub>2</sub> sorption isotherm for MTV-UiO-66-E.

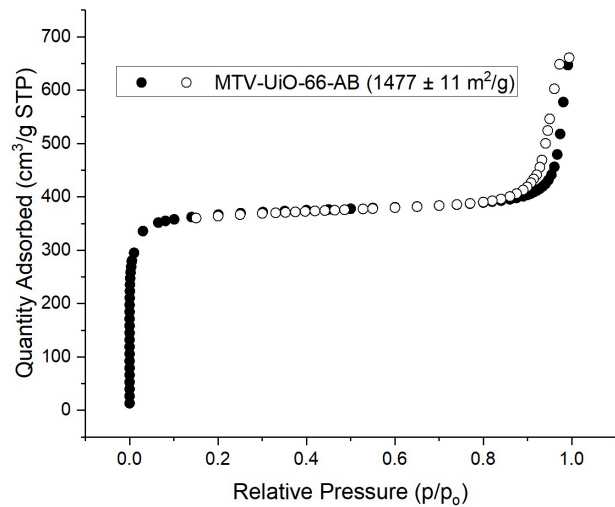

**Figure S38.** N<sub>2</sub> sorption isotherm for MTV-UiO-66-AB.

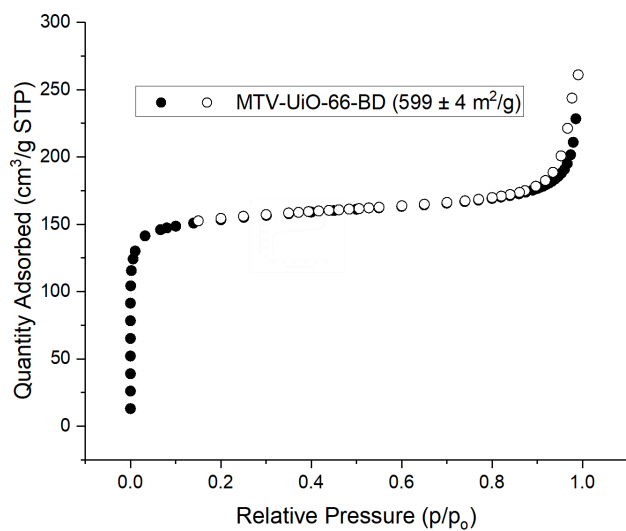

**Figure S39.** N<sub>2</sub> sorption isotherm for MTV-UiO-66-BD.

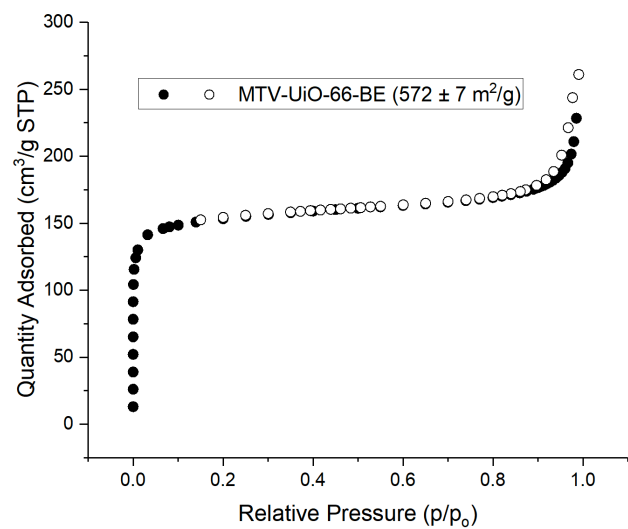

**Figure S40.** N<sub>2</sub> sorption isotherm for MTV-UiO-66-BE.

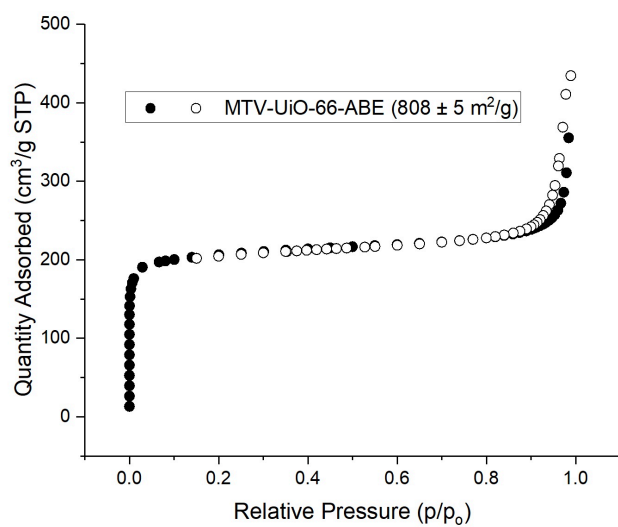

**Figure S41.** N<sub>2</sub> sorption isotherm for MTV-UiO-66-ABE.

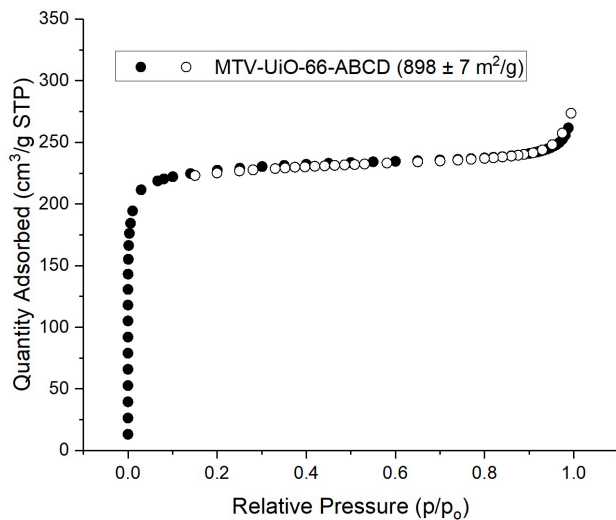

**Figure S42.** N<sub>2</sub> sorption isotherm for MTV-UiO-66-ABCD.

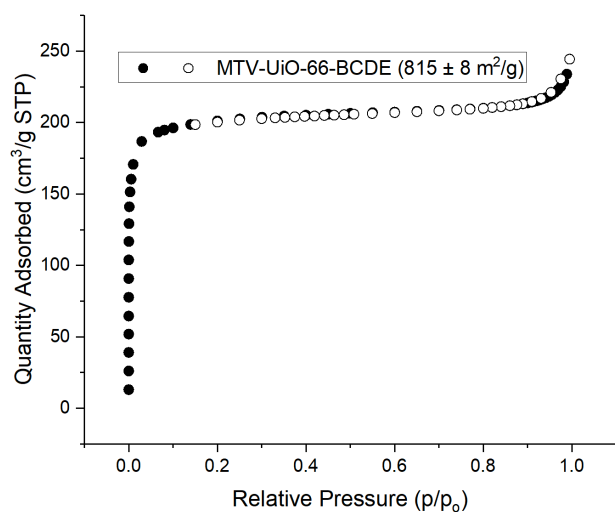

**Figure S43.** N<sub>2</sub> sorption isotherm for MTV-UiO-66-BCDE.

## Thermogravimetric Analysis (TGA)

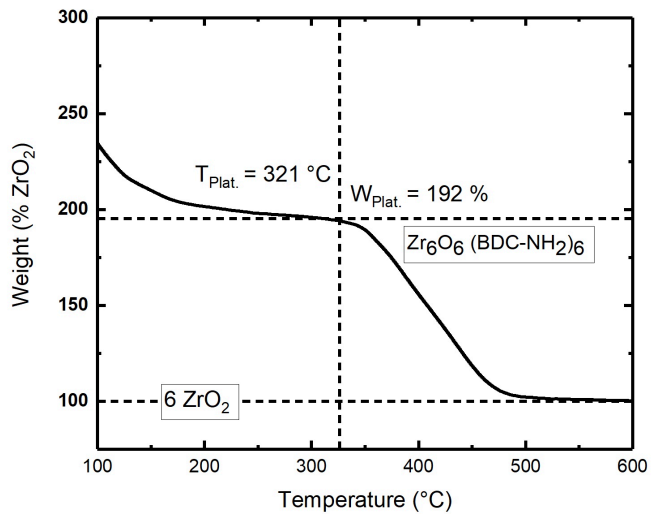

Figure S44. TGA trace for MTV-UiO-66-B.

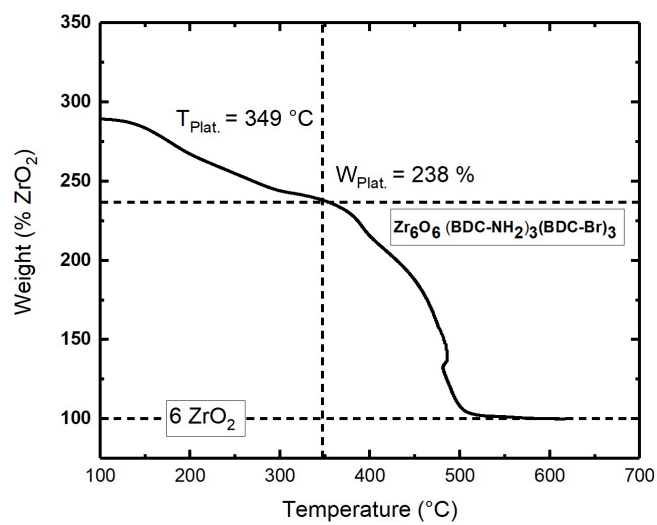

Figure S45. TGA trace for MTV-UiO-66-BE.

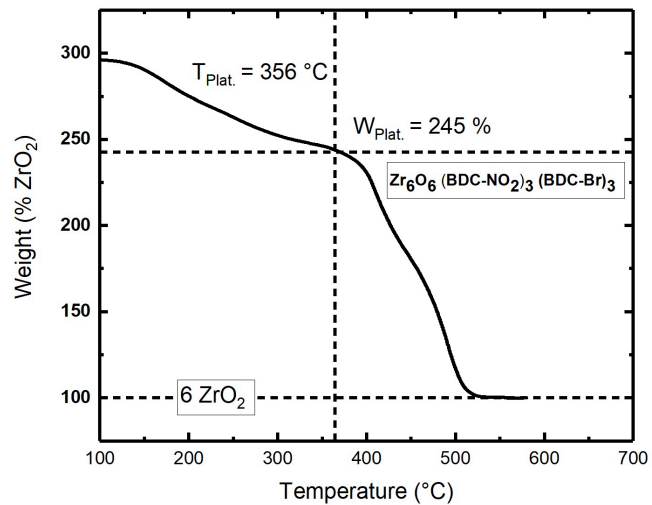

Figure S46. TGA trace for MTV-UiO-66-DE.

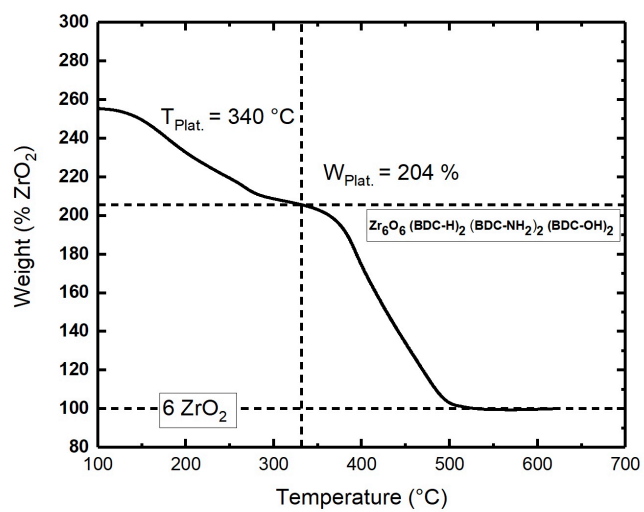

Figure S47. TGA trace for MTV-UiO-66-ABC.

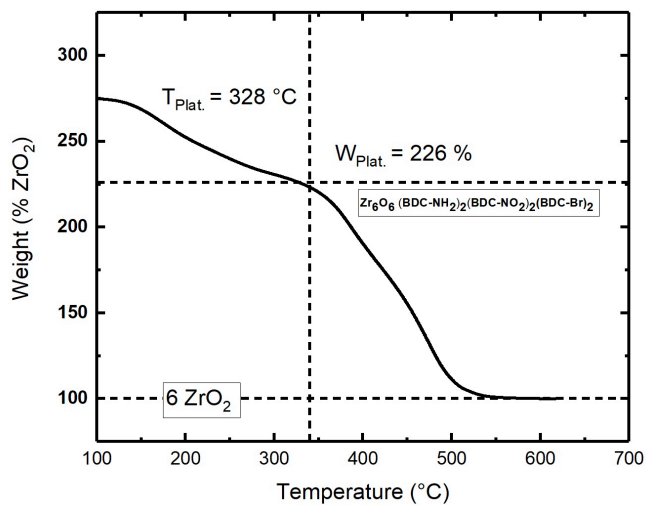

**Figure S48.** TGA trace for MTV-UiO-66-BDE.

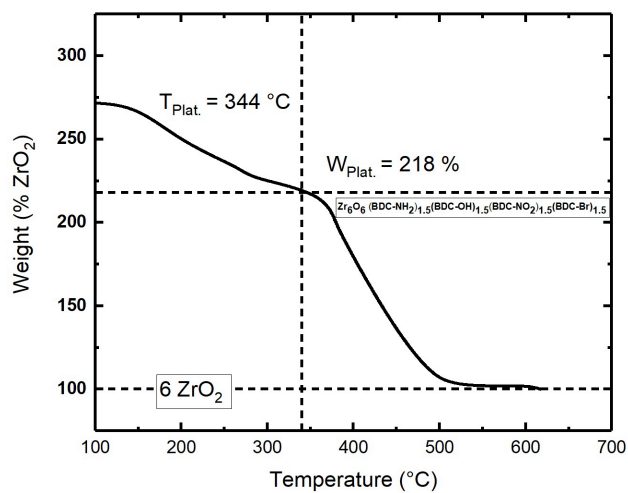

**Figure S49.** TGA trace for MTV-UiO-66-BCDE.

**Table S2.** MTV-UiO-66 MOF defects quantified as carboxylates per SBU.

| MTV-UiO-66 MOF  | Carboxylates/SBU (12 = pristine) |
|-----------------|----------------------------------|
| MTV-UiO-66-DE   | 9.4                              |
| MTV-UiO-66-B    | 10.2                             |
| MTV-UiO-66-BDE  | 9.2                              |
| MTV-UiO-66-ABC  | 8.4                              |
| MTV-UiO-66-BCDE | 9.8                              |
| MTV-UiO-66-BE   | 10.4                             |

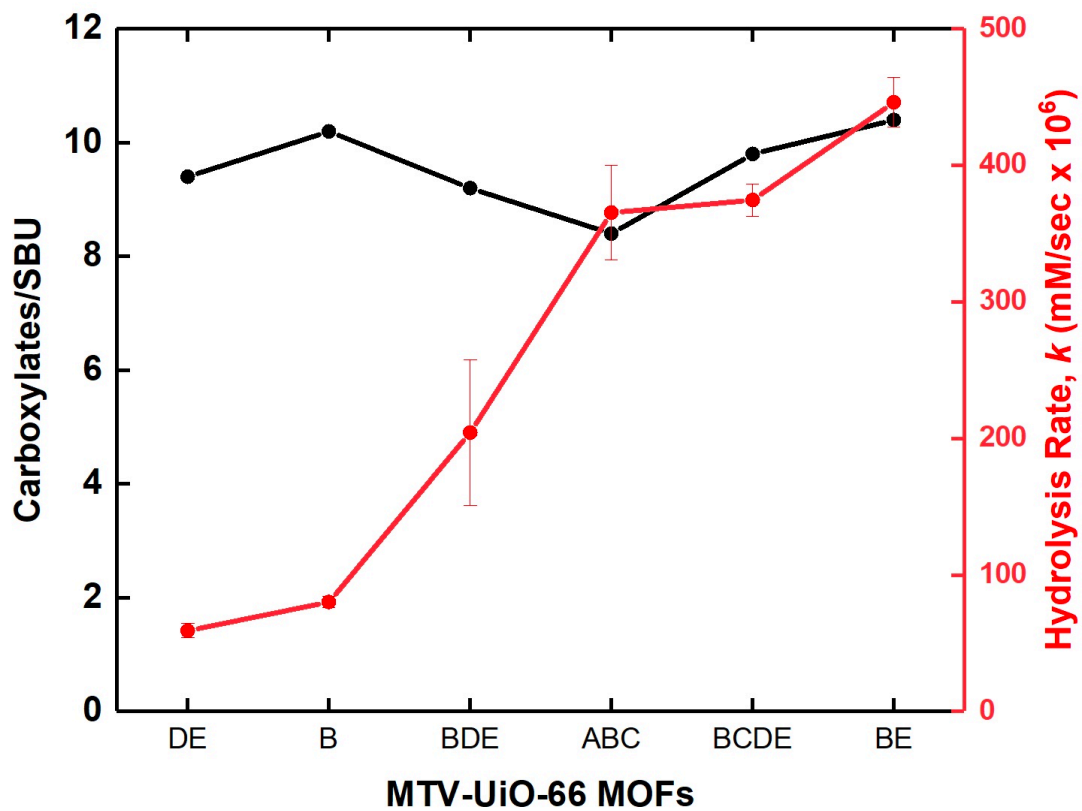

**Figure S50.** Ratio of organic linkers per SBU of MTV-UiO-66 MOFs (black) vs. rate of DMNP degradation by MOFs (red).
